# Analysis of flavonol regulator evolution in the Brassicaceae reveals *MYB12*, *MYB111* and *MYB21* duplications associated with *MYB11* and *MYB24* gene loss

Hanna M. Schilbert<sup>1,2,\*</sup>, Beverley J. Glover<sup>1</sup>

<sup>1</sup> Department of Plant Sciences, University of Cambridge, Cambridge, UK

<sup>2</sup> Genetics and Genomics of Plants, CeBiTec & Faculty of Biology, Bielefeld University, Bielefeld, Germany

\* Correspondence: [hschilbe@cebitec.uni-bielefeld.de](mailto:hschilbe@cebitec.uni-bielefeld.de)

**Background:** Flavonols are the largest subgroup of flavonoids, possessing multiple functions in plants including protection against ultraviolet radiation, antimicrobial activities, and flower pigmentation together with anthocyanins. They are of agronomical and economical importance because the major off-taste component in rapeseed protein isolates is a flavonol derivative, which limits rapeseed protein use for human consumption. Flavonol production in *Arabidopsis thaliana* is mainly regulated by the subgroup 7 (SG7) R2R3-MYB transcription factors *MYB11*, *MYB12*, and *MYB111*. Recently, the SG19 MYBs *MYB21*, *MYB24*, and *MYB57* were shown to regulate flavonol accumulation in pollen and stamens. The members of each subgroup are closely related, showing gene redundancy and tissue-specific expression in *A. thaliana*. However, the evolution of these flavonol regulators inside the Brassicaceae, especially inside the Brassiceae, which include the rapeseed crop species, is not fully understood.

**Results:** We studied the SG7 and SG19 MYBs in 44 species, including 31 species of the Brassicaceae, by phylogenetic analyses followed by synteny and gene expression analyses. Thereby we identified a deep *MYB12* and *MYB111* duplication inside the Brassicaceae, which likely occurred before the divergence of Brassiceae and Thelypodieae. These duplications of SG7 members were followed by the loss of *MYB11* after the divergence of *Eruca vesicaria* from the remaining Brassiceae species. Similarly, *MYB21* experienced duplication before the emergence of the Brassiceae family, where the gene loss of *MYB24* is also proposed to have happened. Due to the overlapping spatio-temporal expression patterns of the SG7 and SG19 MYB members in *B. napus*, the loss of *MYB11* and *MYB24* is likely to be compensated by the remaining homologs.

**Conclusions:** We identified a duplication of *MYB12*, *MYB111*, and *MYB21* inside the Brassicaceae which is associated with *MYB11* and *MYB24* gene loss inside the tribe Brassiceae. We propose that gene redundancy and meso-polyploidization events have shaped the evolution of the flavonol regulators in the Brassicaceae, especially in the Brassiceae.

**Keywords:** flavonoids; gene duplication; gene expression; gene family; gene loss; gene redundancy; MYB; R2R3-MYBs; transcriptional regulation; whole-genome duplication; whole-genome triplication

## Background

The mustard family (Brassicaceae) consists of 351 genera and almost 4000 species [1]. It contains the model plant *Arabidopsis thaliana* and several important crop plants including oilseed rape (*Brassica napus*) and cabbage (*Brassica oleracea*) domesticated for industrial use including food and biofuel production. Recent advances in Brassicaceae taxonomy revealed 51 monophyletic groups (tribes) [2, 3, 1, 4], which can be assigned to major evolutionary lineages. Around 32 million years ago (MYA) the tribe Aethionemeae diverged from the rest of the family [5]. The diversification of the other 50 tribes began ~23 MYA and they are grouped into three [6, 7], four [8], or five lineages/clades [9, 10] (Figure 1).

Three major whole-genome duplication (WGDs) events, namely At- $\alpha$ , At- $\beta$  and At- $\gamma$ , have occurred in the evolution of *A. thaliana* and the core Brassicaceae, which are thought to increase the genetic diversity and species radiation [11–13]. Besides these, several meso-polyploidization events have been identified inside the Brassicaceae, e.g. in the tribe Brassiceae (Figure 1) [14–16]. The whole-genome triplication (Br- $\alpha$ ) in *Brassica* was shown to have occurred after At- $\alpha$  and before the radiation of the tribe Brassiceae [14–16]. Generally, polyploidization is followed by diploidization which is frequently accompanied by genome size reduction and reorganization and therefore genetic and transcriptional changes occur [17]. These changes are the basis for the “Gene Balance Hypothesis” stating that dosage-sensitive

45 genes like transcription factors are over-retained while genes duplicated are preferentially lost after WGD events [18,  
46 19]. It is assumed that polyploids have an adaptive advantage conferred by the availability of duplicated genes for sub-  
47 and neofunctionalization [20].

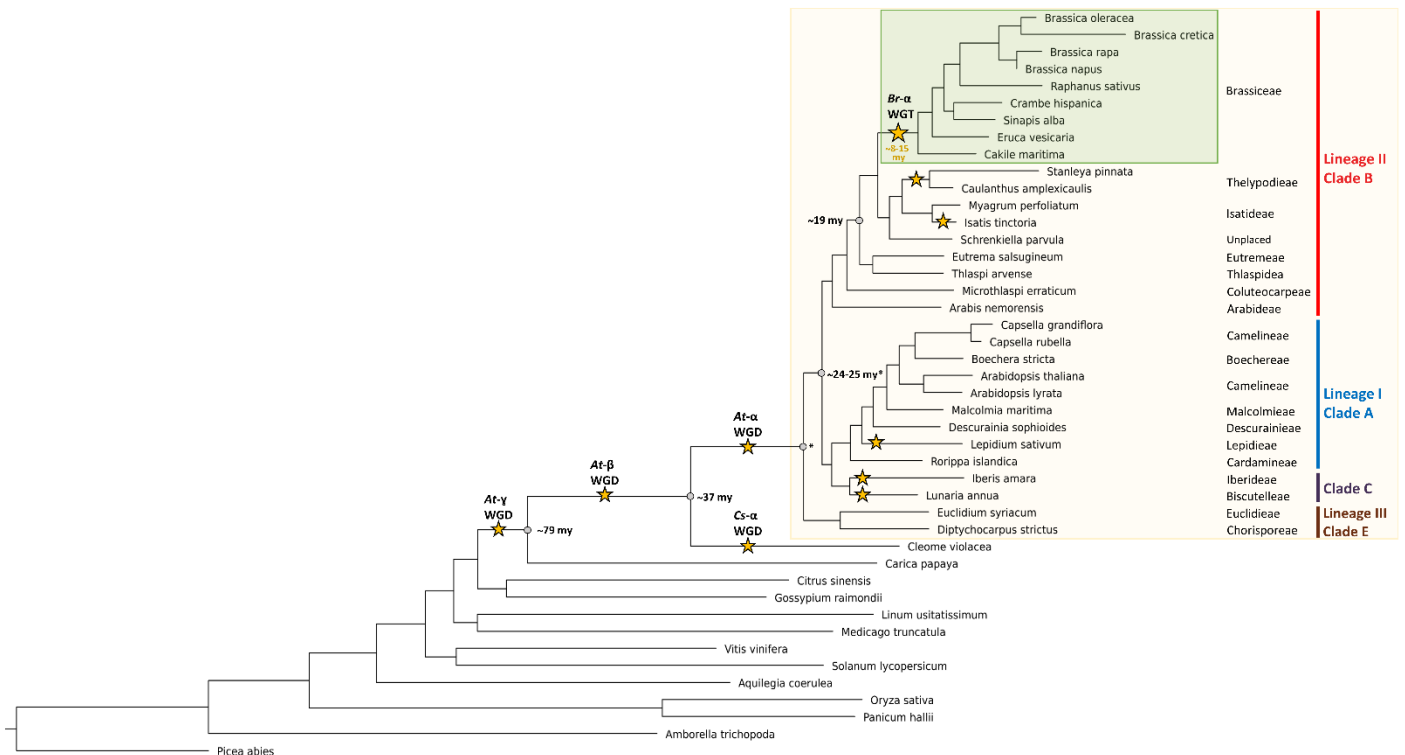

48 **Figure 1: Simplified Brassicaceae phylogeny.** The phylogeny of Brassicaceae family members and outgroup species is  
49 shown. The species tree was built with OrthoFinder based on proteome data sets. The Brassicaceae family is highlighted  
50 in the beige box, while species assigned to the tribe Brassiceae are highlighted in the green box. The Brassicaceae lineages  
51 and clades [9] are coloured as followed: lineage I/clade A in blue, lineage II/clade B in red, lineage III/clade E in brown  
52 and clade C in violet. Clade D is not shown as no species was analysed from this clade. Whole genome duplication  
53 (WGD) events [21–23, 4] and the Brassiceae whole genome triplication (WGT) event are marked with a star and named  
54 according to Barker *et al.*, 2009. Estimated divergence times were added according to Franzke *et al.*, 2011 and Walden *et al.*,  
55 2020.

57 One of the largest transcription factor families in plants are MYB (myeloblastosis) transcription factors [24, 25].  
58 They play pivotal roles in regulatory networks controlling development, metabolism and responses to biotic and abiotic  
59 stresses. MYBs are classified, based on the number of up to four imperfect amino acid sequence repeats (R) in their MYB  
60 domain, into 1R-, R2R3-, 3R-, and 4R-MYBs (summarised in Dubos *et al.*, 2010). Each repeat forms three  $\alpha$ -helices. While  
61 the second and third helices build a helix–turn–helix (HTH) structure [26], the third helix makes direct contact with the  
62 major groove of the DNA [27]. There are two major models describing R2R3-MYB and R1R2R3-MYB evolution: The  
63 “loss” model states that R2R3-MYB evolved from an R1R2R3 ancestral gene by the loss of the R1 repeat [28] while the  
64 “gain” model proposes that an ancestral R2R3-MYB gene gained the R1 repeat by intragenic domain duplication leading  
65 to the emergence of R1R2R3-MYBs [29]. Recent work by Du *et al.* suggests that the gain model provides a more parsimonious  
66 and reasonable explanation for the phylogenetic distribution of two and three repeat MYBs as both MYB classes  
67 are proposed to have coexisted in primitive eukaryotes [30]. However, Jiang *et al.* inferred that the gain model is  
68 unlikely, based on phylogenetic analyses [31].

69 R2R3-MYBs are the largest class of MYB transcription factors as they are exceptionally expanded in plant genomes  
70 [30, 31]. For example, R2R3-MYBs account for 64% and 63% of all MYB proteins in *A. thaliana* and *B. napus*, respectively  
71 [25, 24, 32] (Figure 2). The expansion of the R2R3-MYB family in plants resulted in a wide functional diversity of  
72 R2R3-MYBs, which regulate mainly plant-specific processes like stress responses, development and specialized metabo-  
73 lism [24]. R2R3-MYBs can be further classified into 23 subgroups by characteristic amino-acid motifs in the C-terminal  
74 region [25]. Several subgroups are involved in the regulation of flavonoid biosynthesis, one of the best studied plant  
75 biosynthesis pathways [33]. Flavonoids are responsible for plant pigmentation and can provide protection against biotic  
76 and abiotic stresses like UV-radiation [33]. While the subgroup 6 (SG6) family members MYB75/PAP1, MYB90/PAP2,

77 MYB113, and MYB114 regulate anthocyanin accumulation [34, 35], the SG5 member MYB123/TT2 controls proanthocyanidin biosynthesis in *A. thaliana* [36].

79 Flavonols are the largest subgroup of flavonoids, and are involved in UV-protection and flower pigmentation together with anthocyanins [37, 38]. Moreover they are of agronomical and economical importance as the major off-taste component in rapeseed protein isolates is a flavonol derivative - this limits rapeseed protein palatability and human consumption [39]. The main regulators of flavonol biosynthesis in *A. thaliana* are the SG7 members MYB12, MYB11, and MYB111 [40, 41]. The SG7 MYBs show spatio-differential gene expression patterns in *A. thaliana* seedlings: *MYB12* is expressed in roots, while *MYB111* is expressed in cotyledons and *MYB11* is marginally expressed in specific domains of the seedling including the apical meristem, the primary leaves, the apex of cotyledons, at the hypocotyl-root transition, the origin of lateral roots and the root tip as well as the vascular tissue of lateral roots [41]. However, the *A. thaliana myb11/myb12/myb111* triple mutant retained flavonols in pollen grains and siliques/seeds [42]. This MYB11-, MYB12-, and MYB111-independent accumulation of flavonol glycosylates was recently addressed by the finding of a new group of flavonol regulators belonging to SG19: MYB21, MYB24, and MYB57 [43–45]. The three SG19 MYBs have previously been described to be involved in jasmonate-dependent regulation of stamen development and are expressed in all four whorls of the flower [46–48]. All SG7 MYBs can act as independent transcription factors by regulating e.g. the expression of flavonol synthase (*FLS*) [40, 41, 49], which produces flavonols from dihydroflavonols [50]. Studies have now shown that the SG19 MYBs can also bind and activate the *FLS1* promoter [43–45]. Moreover, MYB99 is postulated to act in a MYB triad with MYB21 and MYB24 to regulate flavonol biosynthesis in anthers [43]. The bZIP transcription factor HY5 is required for *MYB12* and *MYB111* activation under UV-B and visible light in *A. thaliana*, while MYB24 was recently shown to regulate and bind to the HYH (HY5 ortholog) promoter in *Vitis vinifera* [51, 52].

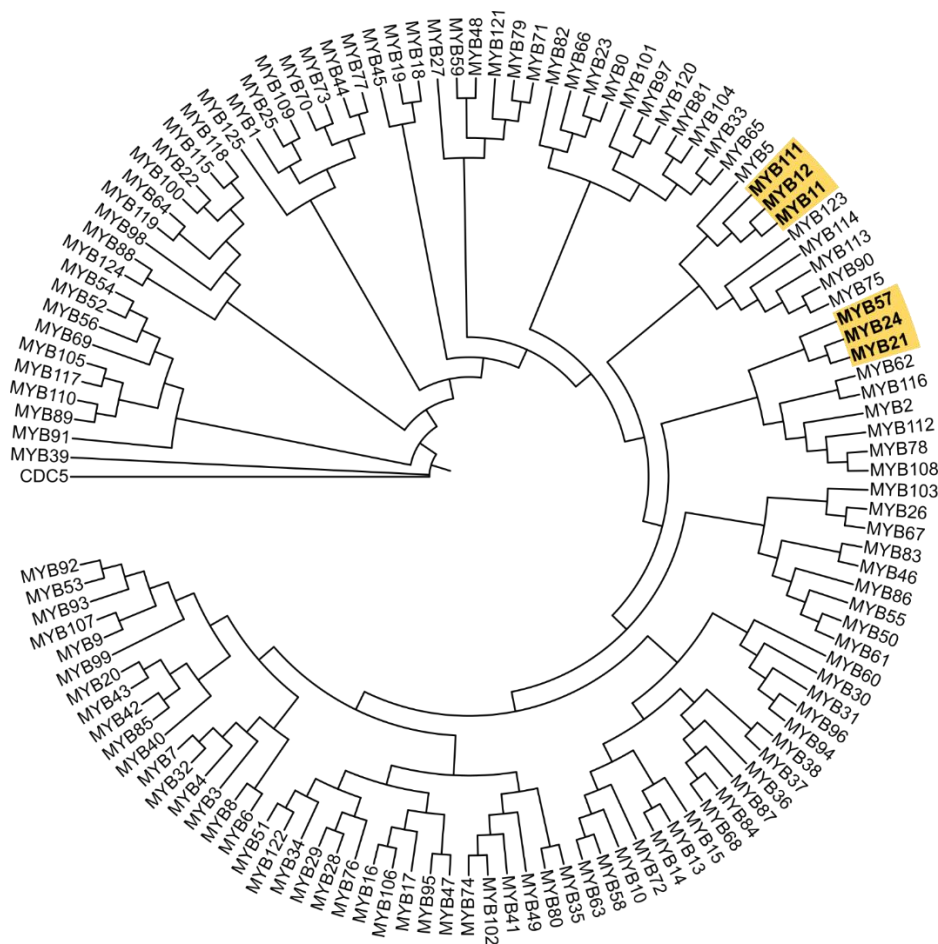

97

98 **Figure 2: Schematic overview of the R2R3-MYB phylogeny of *Arabidopsis thaliana*.** The subgroup 7 MYBs (MYB11, MYB12, MYB111) and subgroup 19 MYBs (MYB21, MYB24, MYB57) are shown in bold highlighted in yellow. The full amino acid sequences were aligned with ClustalW [53]. MEGA version 11.0.11 [54] was used to perform neighbor-joining tree analysis with 1,000 bootstraps.

101

102 In this study we used 44 species, of which 31 belong to the Brassicaceae family, to analyse the evolution of the  
103 flavonol regulators, namely the SG7 and SG19 MYBs. In total, these 31 Brassicaceae species span 17 tribes and represent  
104 all three major lineages of the core Brassicaceae. By incorporating phylogenetic and synteny information, a duplication  
105 of *MYB12*, *MYB111*, and *MYB21* inside the Brassicaceae accompanied by the loss of *MYB11* and *MYB24* inside the Bras-  
106 siceae was identified. Gene expression analyses suggest that gene redundancy might have played a role in the loss of  
107 *MYB11* and *MYB24*. Moreover, the meso-polyploidization events in the Brassicaceae likely shaped the evolution of  
108 flavonol regulators, especially in the tribe Brassiceae.

109

## 110 Results

111 In this study we used a comprehensive data set collection derived from 44 species, including 31 Brassicaceae spe-  
112 cies spanning 17 tribes (Figure 1, Additional file 1). The inferred species tree revealed that most of the analysed Brassi-  
113 caceae tribes are monophyletic and can be assigned to the three major lineages characteristic for the Brassicaceae family  
114 (Figure 1). In this analysis the Brassiceae tribe is represented by 9 species (*Brassica oleracea*, *Brassica cretica*, *Brassica rapa*,  
115 *Brassica napus*, *Raphanus sativus*, *Crambe hispanica*, *Sinapis alba*, *Eruca vesicaria*, *Cakile maritima*), which has the Isatideae  
116 and Thelypodieae as sister clades. The quality assessment revealed that the majority of the 44 proteome data sets (Bras-  
117 siceae and non-Brassicaceae) are suitable for this analysis due to often more than 90% complete BUSCOs (Additional  
118 file 1). The 31 Brassicaceae data sets revealed 71.2% (*Stanleya pinnata*) to 99.3% (*A. thaliana*) complete BUSCOs empha-  
119 sizing the overall high completeness of these data sets.

120 The genome-wide identification of MYB proteins revealed different numbers of 1R-, R2R3-, 3R-MYBs and MYB-re-  
121 lated proteins per species, ranging inside the Brassicaceae from 1 to 17 for 1R-, 90 to 442 for R2R3-, and 3 to 19 for  
122 3R-MYBs (Additional file 2). In order to analyse the SG7 and SG19 R2R3-MYBs in the Brassicaceae in detail all respective  
123 homologs per species were extracted and used for phylogenetic analyses (Additional file 3, Figure 3). In addition, all  
124 MYB123 (SG5) and MYB99 homologs were incorporated because MYB123 regulates a competing branch of the flavonoid  
125 pathway and is sister clade to SG7, and MYB99 is proposed to act in a regulatory triad with the SG19 MYBs. Interest-  
126 ingly, divergence into *MYB11* and *MYB12*, as well as *MYB21* and *MYB24*, was specifically observed for Brassicaceae  
127 members, while *Cleome violacea* revealed only one *MYB11*-*MYB12* and *MYB21*-*MYB24* homolog. Additional *MYB11*-  
128 *MYB12* and *MYB21*-*MYB24* homologs from several non-Brassicaceae species like tomato were identified as clusters  
129 preceding the divergence of the Brassicaceae *MYB11*, *MYB12*, *MYB21* and *MYB24* homologs. This suggests the emer-  
130 gence of separate *MYB11* and *MYB12* as well as *MYB21* and *MYB24* clades after the divergence of the Cleomaceae from  
131 its sister group the Brassicaceae (Figure 3).

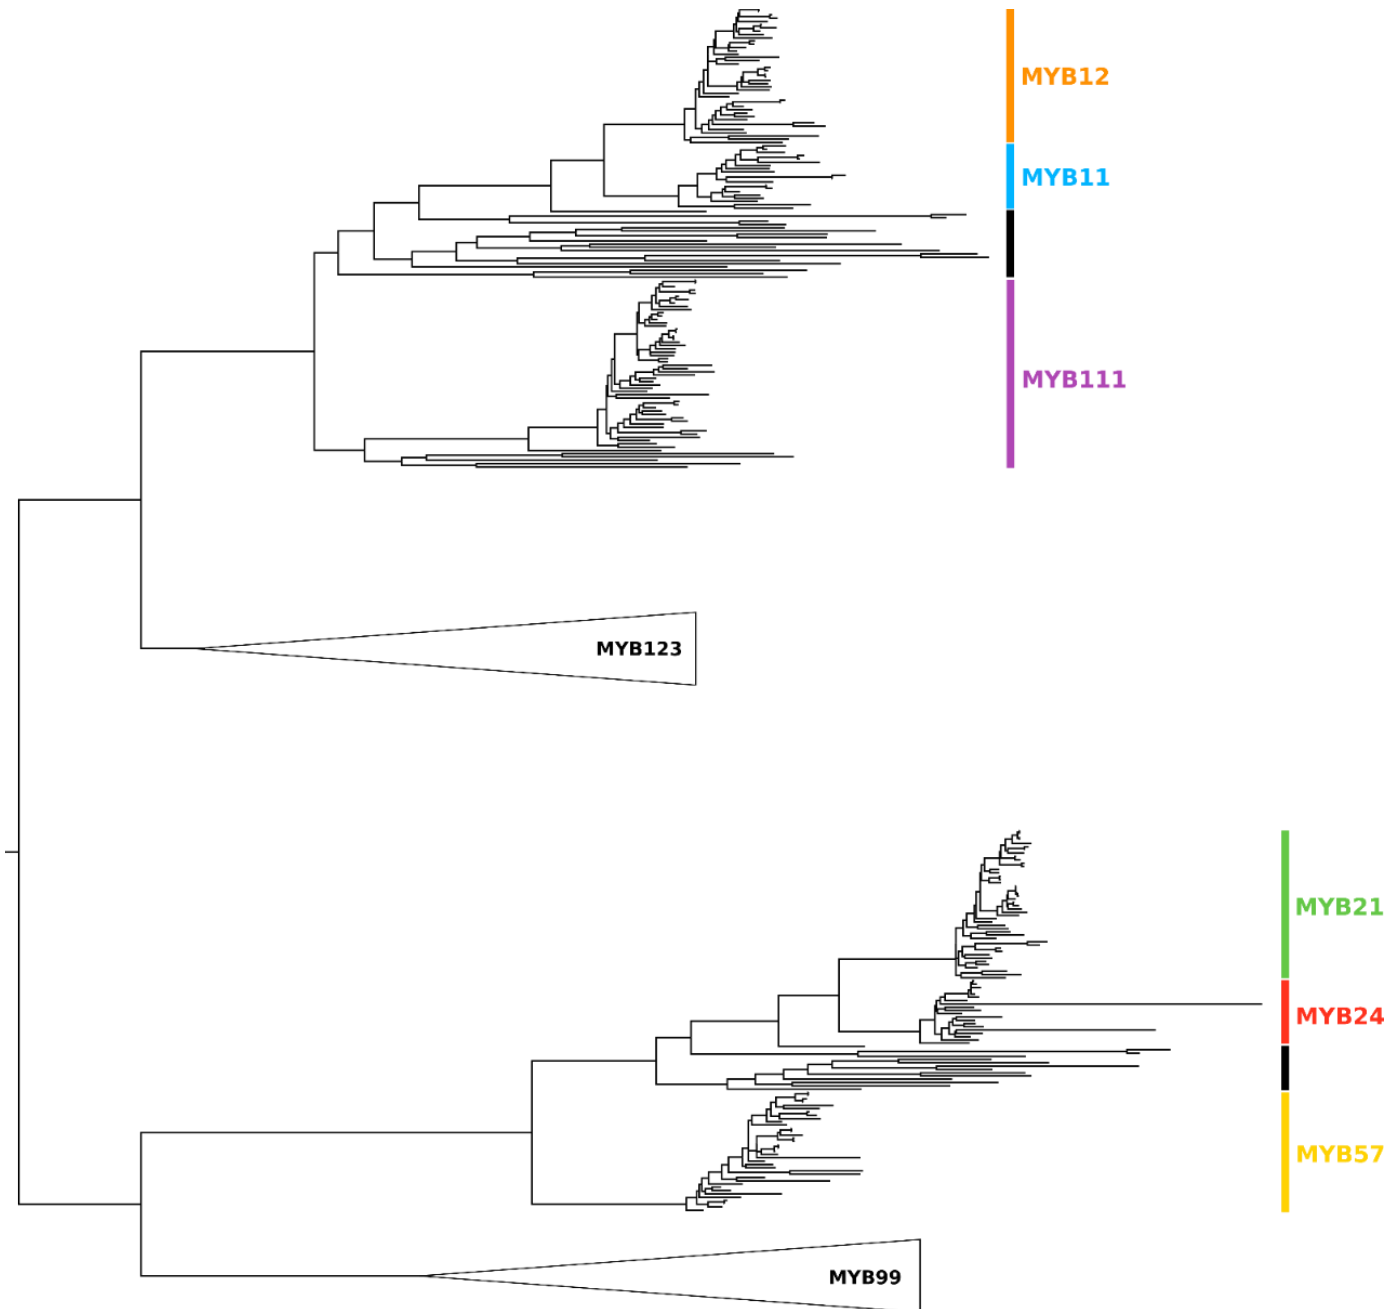

132

133 **Figure 3: Scheme of the phylogenetic relationships of SG7 and SG19 members.** The phylogenetic relationship of the  
134 SG7 (MYB11, MYB12, MYB111) and SG19 MYBs (MYB21, MYB24, MYB57) is displayed. The classification per clade is  
135 based on the respective *A. thaliana* homolog: the MYB12 clade is coloured in orange, MYB11 in light blue, MYB111 in  
136 violet, MYB21 in green, MYB24 in red, and MYB57 in yellow. The black vertical bars inside the SG7 and SG19 clades  
137 mark the MYB11-MYB12 and MYB21-MYB24 sequences derived from species outside of the Brassicaceae, respectively.  
138 The MYB123 and MYB99 clade were collapsed and are represented by triangles as labeled. The figure is not to scale.

### 139 *Phylogeny of SG7 MYBs*

140 The phylogenetic analysis of SG7 members MYB11, MYB12, and MYB111 revealed that at least one MYB111 hom-  
141 olog is present per Brassicaceae species, except for *Arabidopsis nemorensis* (Figure 4, Additional file 3, Additional file 4). Simi-  
142 larly, the majority of Brassicaceae members contained one MYB12 homolog. However, all Brassicaceae species possess a  
143 duplication of MYB12 and MYB111 (Figure 4). At least two MYB111 and MYB12 homologs were also identified in the  
144 closely related species *Caulanthus amplexicaulis* and *Isatis tinctoria*, while only two MYB111 and no MYB12 homolog were  
145 detected in *Stanleya pinnata*. However, the duplication event in *I. tinctoria* is likely associated with the independent  
146 meso-polyploidization event occurring in this tribe as shown by the close phylogenetic relationship of the respective  
147 MYB111 and MYB12 homologs (Figure 1, Figure 4). Even though independent meso-polyploidization events have also



148 occurred in *C. amplexicaulis* and *S. pinnata*, the respective *MYB11* homologs fall into two separate clades indicating a  
 149 deeper *MYB11* duplication preceding the divergence of the Brassiceae. The same applies for the *MYB12* duplication of  
 150 *C. amplexicaulis*. Interestingly, no *MYB11* homolog was identified in the *Brassica* species, *R. sativus*, *C. hispanica*, and  
 151 *S. alba*, indicating that *MYB11* might be absent in these species (Figure 4). As two *MYB11* homologs were found in  
 152 *E. vesicaria* and one in *C. maritima*, this gene loss is assumed to have occurred after the divergence of *E. vesicaria*. More-  
 153 over, no *MYB11* homolog was detected in *S. pinnata*, *Schrenkiella parvula*, *Thlaspi arvense*, *Malcolmia maritima*, *Des-*  
 154 *curainia sophioides*, and *Lepidium sativum*.

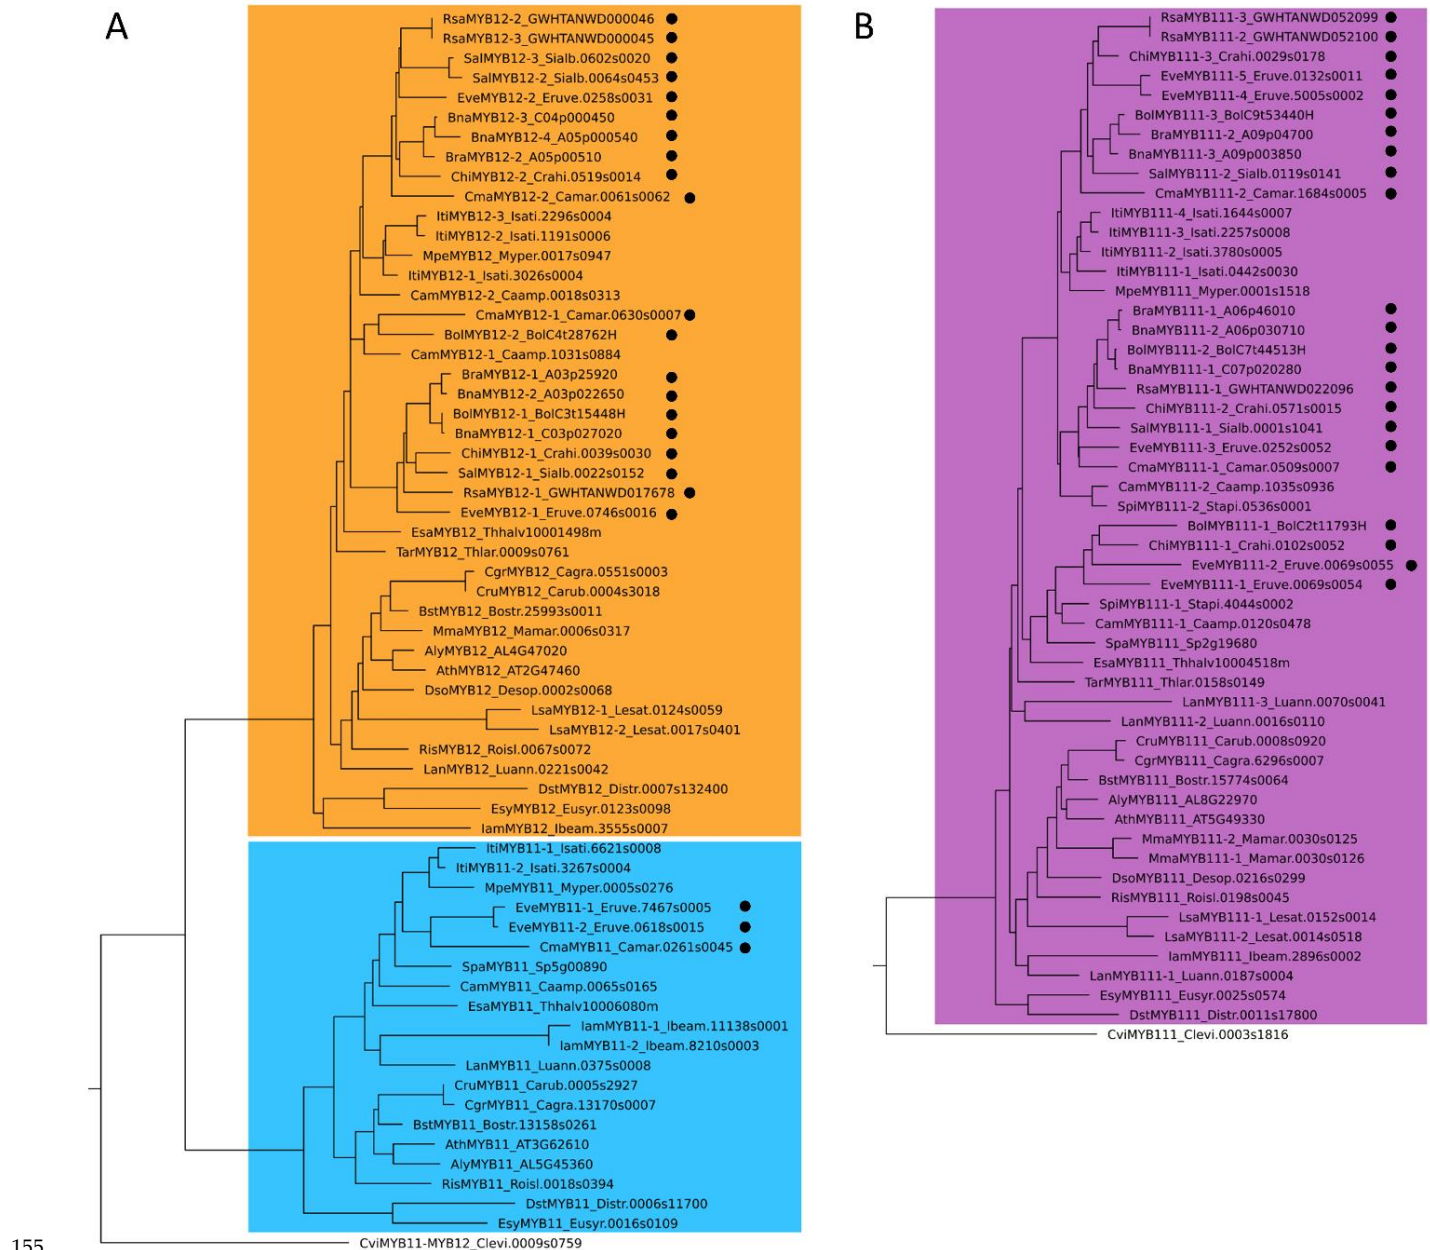

156 **Figure 4: Phylogeny of SG7 members in Brassicaceae.** The phylogenies of *MYB11* and *MYB12* (A) and *MYB111* (B)  
 157 homologs of the Brassicaceae are displayed. Homologs of Brassicaceae species are marked with a black circle. The *MYB12*  
 158 clade is coloured in orange, the *MYB11* clade in light blue, and the *MYB111* clade in violet. The classification per clade  
 159 is based on the respective *A. thaliana* homologs. The identified SG7 homologs of *Cleome violacea* are displayed as *C. vio-*  
 160 *lacea* serves as representative of the Cleomaceae, which is sister group to Brassicaceae. The figure is not to scale.

#### 161 Synteny analysis of SG7 MYBs

162 The potential *MYB11* gene loss inside the Brassicaceae was analysed in detail by examining the degree of local  
 163 synteny at the *MYB11* locus. In line with the phylogenetic analysis, *MYB11* was absent from the genomic regions of  
 164 *B. napus*, *B. oleracea*, *B. rapa*, *R. sativus*, *C. hispanica*, and *S. alba* showing the highest local synteny with the corresponding

165 *MYB11* locus from *A. thaliana*, while a *MYB11* homolog was identified for *E. vesicaria*, *C. maritima*, *I. tinctoria*, and *My-*  
166 *agrum perfoliatum* (Figure 5). Supporting these findings, no *MYB11* homolog was identified via a TBLASTN search  
167 against these syntenic regions, as well as the genome sequences of the *Brassica* species, *R. sativus*, *C. hispanica*, and *S. alba*.

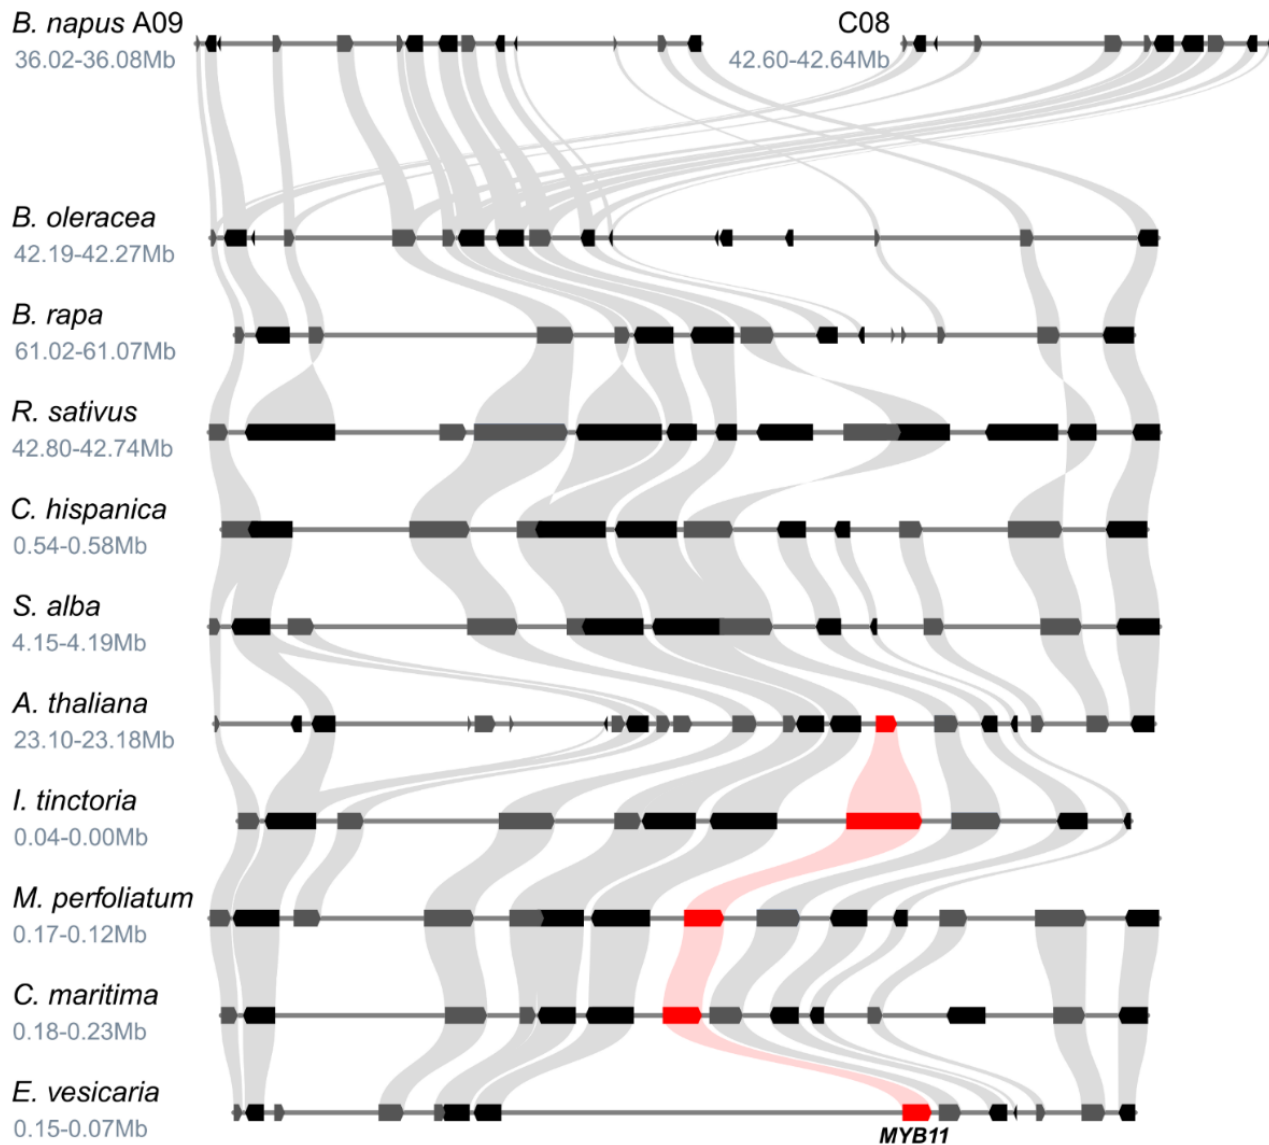

168

169 **Figure 5: Synteny analysis of the *MYB11* locus suggests gene loss inside the Brassiceae.** The syntenic relationship at  
170 the *MYB11* locus is shown for several Brassicaceae members. The position of the genomic region in the respective ge-  
171 nome assembly is given underneath the species name in million base pairs (Mb). Grey curved beams connect the identi-  
172 fied syntenic genes. The rectangle-shaped arrows represent annotated genes. Genes located on the forward strand are  
173 shown in grey and genes located on the reverse strand are shown in black. *MYB11* homologs are marked in red and  
174 connected by light red lines.

#### 175 *Gene expression analyses of SG7 MYBs*

176 In order to analyse the expression patterns of SG7 members in Brassicaceae and to investigate whether the duplica-  
177 tions of *MYB12* and *MYB111* result in different tissue-specific expression patterns, we harnessed RNA-Seq data sets of  
178 *B. napus* (Table 1). In general, *BnaMYB111-2\_A06p030710* and *BnaMYB111-1\_C07p020280* show a similar expression pat-  
179 tern across multiple tissues (anther, petal, bud, and silique). However, *BnaMYB111-2\_A06p030710* revealed unique ex-  
180 pression in developing seeds, seed coat, and sepals. *BnaMYB111-3\_A09p003850* was not expressed in any of the analysed  
181 tissues. While all four *BnaMYB12* homologs are expressed in reproductive tissues (anthers, pistils, ovules, buds, young  
182 seeds), only three homologs (*BnaMYB12-3\_C04p000450*, *BnaMYB12-2\_A03p022650*, *BnaMYB12-1\_C03p027020*) are addi-  
183 tionally expressed in mature seeds and seed coat. Uniquely tissue-specific expression comparing all SG7 MYBs was

184 identified for *BnaMYB12-3\_C04p000450* in late seed coat development (35 DAF) and *BnaMYB111-2\_A06p030710* is  
 185 uniquely expressed in sepals and mature seeds compared to the other *BnaMYB111* homologs.

186 Three of the four *BnaMYB12* homologs (*BnaMYB12-3\_C04p000450*, *BnaMYB12-2\_A03p022650*,  
 187 *BnaMYB12-4\_A05p000540*) had overlapping co-expression patterns with genes related to flavonol biosynthesis, includ-  
 188 ing *F3'H* and the flavonol glycosyltransferase *UGT84A2* (Additional file 5). However, only *BnaMYB12-1\_C03p027020*  
 189 and *BnaMYB12-3\_C04p000450* were additionally co-expressed with *CHS*, *F3H*, *CHIL*, and *FLS1*. Interestingly,  
 190 *BnaMYB12-4\_A05p000540* was found to be co-expressed with *MYB106*, a transcription factor involved in trichome  
 191 branching regulation in *A. thaliana*. No co-expressed genes were identified for the marginally expressed *BnaMYB111-*  
 192 *3\_A09p003850*. However, the other two *BnaMYB111* homologs were co-expressed with genes derived from the flavo-  
 193 noid/flavonol biosynthesis and phenylpropanoid pathway including *FLS1*, *F3H*, flavonol glycosyltransferases, and  
 194 *4CL3* (Additional file 5).

195 **Table 1: Tissue-specific expression of SG7 MYBs in *B. napus*.** The tissue-specific expression of the identified *MYB12*  
 196 and *MYB111* homologs in *B. napus* is presented in mean transcripts per million (TPMs). The number of analysed data  
 197 sets per tissue is stated in brackets (n=X). Intensity of the blue colouration indicates the expression strength (darker =  
 198 stronger expression). Abbreviations: weeks after pollination (WAP), days after pollination (DAP), days after flowering  
 199 (DAF), days (D), shoot apical meristem (SAM).

|                          | <i>MYB12-1</i><br><i>C03p027020</i> | <i>MYB12-2</i><br><i>A03p022650</i> | <i>MYB12-3</i><br><i>C04p000450</i> | <i>MYB12-4</i><br><i>A05p000540</i> | <i>MYB111-1</i><br><i>C07p020280</i> | <i>MYB111-2</i><br><i>A06p030710</i> | <i>MYB111-3</i><br><i>A09p003850</i> |
|--------------------------|-------------------------------------|-------------------------------------|-------------------------------------|-------------------------------------|--------------------------------------|--------------------------------------|--------------------------------------|
| SAM (n=16)               | 0.4                                 | 0.6                                 | 0.5                                 | 0.0                                 | 0.1                                  | 0.1                                  | 0.1                                  |
| Anther prophase 1 (n=12) | 2.0                                 | 2.9                                 | 1.3                                 | 1.6                                 | 19.4                                 | 23.5                                 | 0.0                                  |
| Anther bolting (n=6)     | 0.3                                 | 0.2                                 | 0.6                                 | 0.7                                 | 2.9                                  | 2.9                                  | 0.0                                  |
| Anther flowering (n=4)   | 1.0                                 | 3.0                                 | 3.8                                 | 0.6                                 | 5.5                                  | 9.1                                  | 0.0                                  |
| Stamen (n=1)             | 0.1                                 | 0.1                                 | 0.4                                 | 1.0                                 | 0.0                                  | 0.0                                  | 0.0                                  |
| Ovule (n=1)              | 4.7                                 | 3.2                                 | 3.1                                 | 1.5                                 | 0.0                                  | 0.8                                  | 0.1                                  |
| Pistil (n=3)             | 0.8                                 | 1.5                                 | 1.8                                 | 1.1                                 | 0.1                                  | 0.3                                  | 0.0                                  |
| Sepal (n=1)              | 0.0                                 | 0.0                                 | 0.0                                 | 0.0                                 | 0.0                                  | 2.3                                  | 0.0                                  |
| Petal (n=2)              | 0.6                                 | 3.1                                 | 6.8                                 | 6.3                                 | 1.0                                  | 1.0                                  | 0.0                                  |
| bud (n=33)               | 2.2                                 | 4.0                                 | 3.1                                 | 1.9                                 | 9.4                                  | 13.3                                 | 0.1                                  |
| Silique 10-20DAF (n=13)  | 0.9                                 | 1.3                                 | 0.6                                 | 0.3                                 | 0.3                                  | 0.7                                  | 0.0                                  |
| Silique 25DAF (n=6)      | 1.1                                 | 1.6                                 | 1.3                                 | 0.3                                 | 0.4                                  | 0.4                                  | 0.1                                  |
| Silique 30DAF (n=6)      | 1.0                                 | 0.9                                 | 0.5                                 | 0.1                                 | 1.3                                  | 1.3                                  | 0.1                                  |
| Silique 40DAF (n=2)      | 0.2                                 | 0.1                                 | 0.0                                 | 0.0                                 | 0.1                                  | 0.1                                  | 0.0                                  |
| Seed 2WAP (n=1)          | 6.3                                 | 4.5                                 | 2.9                                 | 5.7                                 | 0.0                                  | 1.5                                  | 0.0                                  |
| Seed 4WAP (n=1)          | 4.6                                 | 4.0                                 | 3.4                                 | 0.6                                 | 0.0                                  | 2.2                                  | 0.0                                  |
| Seed 6WAP (n=1)          | 0.2                                 | 0.0                                 | 0.0                                 | 0.0                                 | 0.0                                  | 2.6                                  | 0.0                                  |
| Seed 8WAP (n=1)          | 0.0                                 | 0.3                                 | 0.0                                 | 0.0                                 | 0.0                                  | 0.0                                  | 0.0                                  |
| Seed brown 26DAF (n=1)   | 4.7                                 | 4.8                                 | 5.3                                 | 0.8                                 | 0.0                                  | 0.5                                  | 0.3                                  |
| Seed yellow 26DAF (n=1)  | 3.9                                 | 3.5                                 | 4.7                                 | 0.3                                 | 0.0                                  | 1.6                                  | 0.0                                  |
| Seed coat 14DAF (n=7)    | 4.8                                 | 6.2                                 | 7.2                                 | 0.0                                 | 0.0                                  | 1.6                                  | 0.0                                  |
| Seed coat 21DAF (n=6)    | 7.3                                 | 6.7                                 | 17.1                                | 0.0                                 | 0.7                                  | 13.8                                 | 0.0                                  |
| Seed coat 28DAF (n=6)    | 4.2                                 | 4.3                                 | 17.1                                | 0.0                                 | 0.1                                  | 0.6                                  | 0.0                                  |
| Seed coat 35DAF (n=6)    | 0.9                                 | 0.4                                 | 6.3                                 | 0.0                                 | 0.0                                  | 0.2                                  | 0.0                                  |



|                           |     |     |     |     |     |     |     |
|---------------------------|-----|-----|-----|-----|-----|-----|-----|
| Seed coat 42DAF (n=6)     | 0.5 | 0.1 | 0.8 | 0.0 | 0.0 | 0.1 | 0.0 |
| Embryo (n=6)              | 0.8 | 0.6 | 0.0 | 0.0 | 1.3 | 2.6 | 0.2 |
| Endosperm (n=8)           | 0.6 | 0.1 | 1.0 | 0.1 | 0.0 | 0.1 | 0.0 |
| Seedling (n=9)            | 1.1 | 0.9 | 0.7 | 0.1 | 0.3 | 1.8 | 0.1 |
| Cotyledon 7-10D (n=34)    | 0.2 | 0.3 | 0.1 | 0.0 | 0.0 | 0.2 | 0.0 |
| Leaf juvenile (n=12)      | 0.7 | 0.9 | 0.7 | 0.3 | 0.5 | 0.9 | 0.0 |
| Leaf old (n=12)           | 0.6 | 0.7 | 0.6 | 0.2 | 0.1 | 0.0 | 0.0 |
| Internode flowering (n=6) | 0.2 | 0.1 | 0.3 | 0.1 | 0.0 | 0.1 | 0.0 |
| Stem (n=19)               | 1.8 | 2.4 | 0.6 | 0.1 | 0.2 | 0.3 | 0.0 |
| Shoot (n=2)               | 0.7 | 0.5 | 1.2 | 0.5 | 0.6 | 0.4 | 0.1 |
| Shoot apices (n=2)        | 0.2 | 0.8 | 1.6 | 0.8 | 0.5 | 0.2 | 0.0 |
| Root seedling (n=13)      | 0.1 | 0.1 | 0.1 | 0.0 | 0.0 | 0.0 | 0.0 |
| Root 30DAP (n=20)         | 0.1 | 0.1 | 0.0 | 0.0 | 0.0 | 0.0 | 0.0 |
| Root 60DAP (n=2)          | 0.1 | 0.0 | 0.0 | 0.0 | 0.0 | 0.0 | 0.0 |

200

201 *Phylogeny of SG19 MYBs*

202 At least one *MYB57* and one *MYB21* homolog was identified in the analysed Brassicaceae species via phylogenetic  
 203 analysis, except no *MYB57* homolog was detected in *S. pinnata* (Figure 6, Additional file 3, Additional file 4). All Bras-  
 204 siceae species, *C. amplexicaulis* and *I. tinctoria* revealed the presence of two *MYB21* homologs, indicating a duplication  
 205 event. The *MYB21* duplication event in *I. tinctoria* is likely associated with the independent meso-polyploidization event  
 206 occurring in this tribe as shown by the close phylogenetic relationship of the *MYB21* homologs (Figure 1, Figure 6).  
 207 However, the *MYB21* homologs of *C. amplexicaulis* fall into two separate clades indicating a deeper *MYB21* duplication  
 208 preceding the divergence of the Brassicaceae. Additionally, most Brassicaceae species contained two *MYB57* homologs with  
 209 *C. hispanica* and *S. alba* being the exceptions with only one *MYB57* homolog identified in each of them. Besides *I. tinctoria*  
 210 none of the closest sister tribes of the Brassicaceae revealed more than one *MYB57* homolog. The independent meso-pol-  
 211 yploidization event of *I. tinctoria* likely resulted in two *MYB57* homologs from which a third *MYB57* homolog likely  
 212 emerged from tandem duplication. Thus, the *MYB57* duplication event likely took place after the divergence of the  
 213 Brassicaceae and *C. hispanica*, and *S. alba* subsequently lost one *MYB57* homolog.

214 No *MYB24* homolog was identified in all analysed Brassicaceae species, as well as *S. pinnata*, *A. nemorensis*,  
 215 *Capsella grandiflora*, *Euclidium syriacum*, and *Diptychocarpus strictus* (Figure 6). At least one *MYB24* copy was detected in  
 216 the remaining 17 Brassicaceae species. As all species of the closest Brassicaceae sister tribes contain a *MYB24* homolog  
 217 except for *S. pinnata*, which has a low-quality data set, the loss of *MYB24* is suggested to have occurred after the diver-  
 218 gence of the Brassicaceae tribe. Moreover, *MYB24* might have been lost in the common ancestor of *E. syriacum* and *D. stric-*  
 219 *tus*.

220

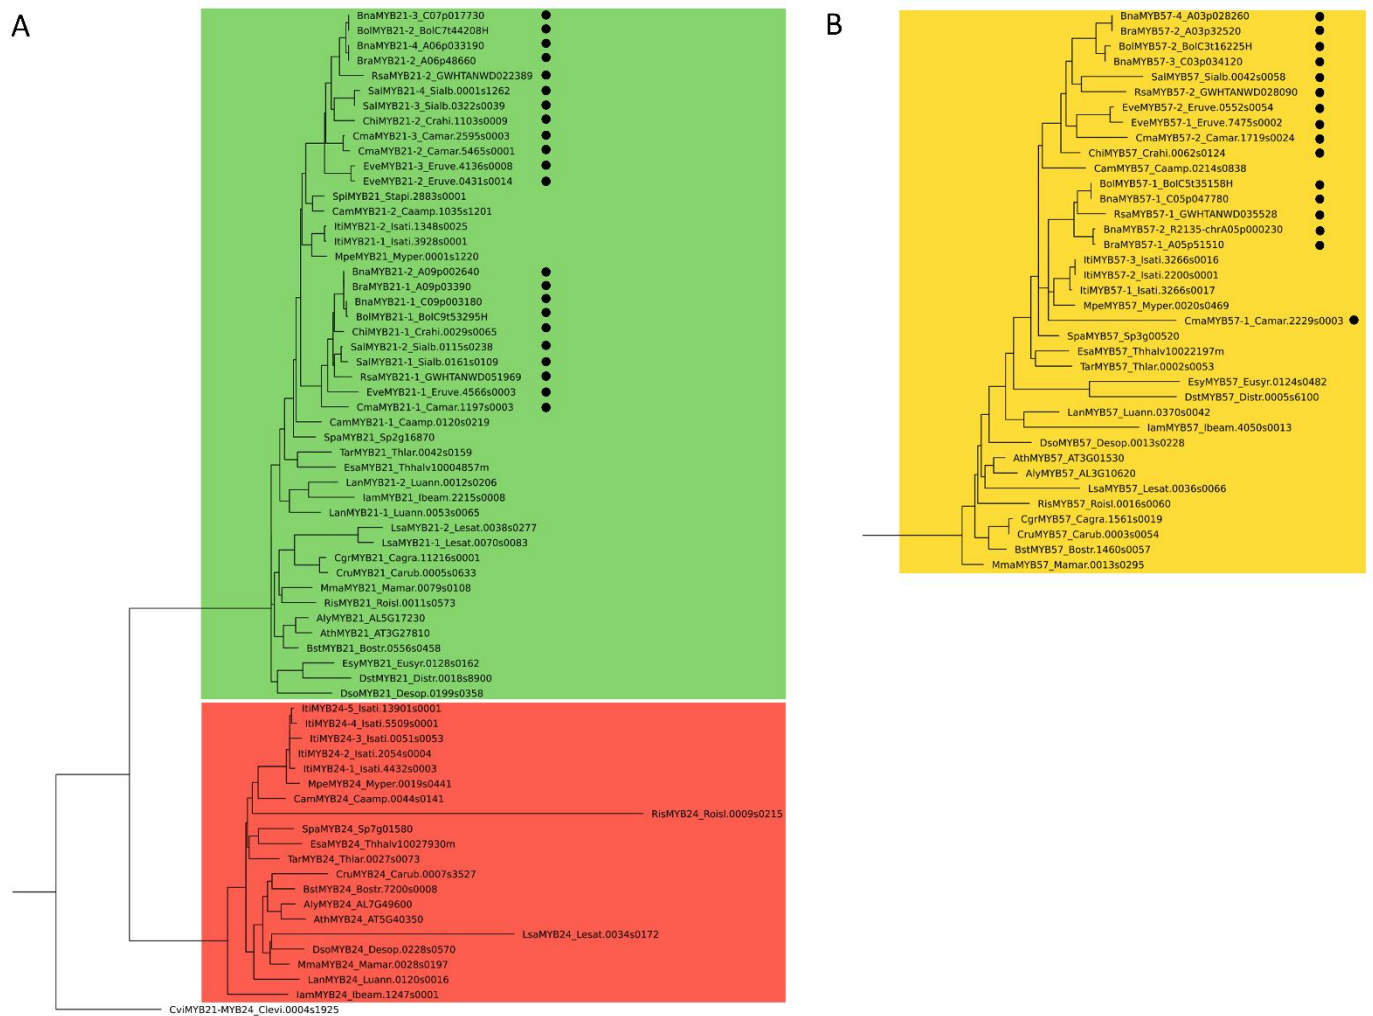

221

222 **Figure 6: Phylogeny of SG19 members in Brassicaceae.** The phylogenies of MYB21 and MYB24 (A) and MYB57 (B)  
 223 homologs of the Brassicaceae is displayed. The MYB21 clade is coloured in green, the MYB24 clade in red, and the  
 224 MYB57 clade in yellow. Homologs of Brassicaceae species are marked with a black circle. The classification per clade is  
 225 based on the respective *A. thaliana* homologs. The identified SG19 homologs of *Cleome violacea* are displayed as *C. viola-*  
 226 *cea* serves as representative of the Cleomaceae, which is sister group to Brassicaceae. The figure is not to scale.

227 *Synteny analysis of SG19 MYBs*

228 In accordance with the phylogenetic analyses, MYB24 could not be detected via local synteny analysis in *B. napus*,  
 229 *B. oleracea*, *B. rapa*, *R. sativus*, and *S. alba*, while the locus containing a MYB24 homolog of *M. perfoliatum* showed high  
 230 local synteny to the MYB11 locus of *A. thaliana* (Figure 7). Supporting these findings, no MYB24 homolog was identified  
 231 in the syntenic regions of *B. napus*, *B. oleracea*, *B. rapa*, *R. sativus*, and *S. alba* via a TBLASTN search. Additionally, no  
 232 MYB24 homolog was detected in all nine Brassicaceae genome sequences.

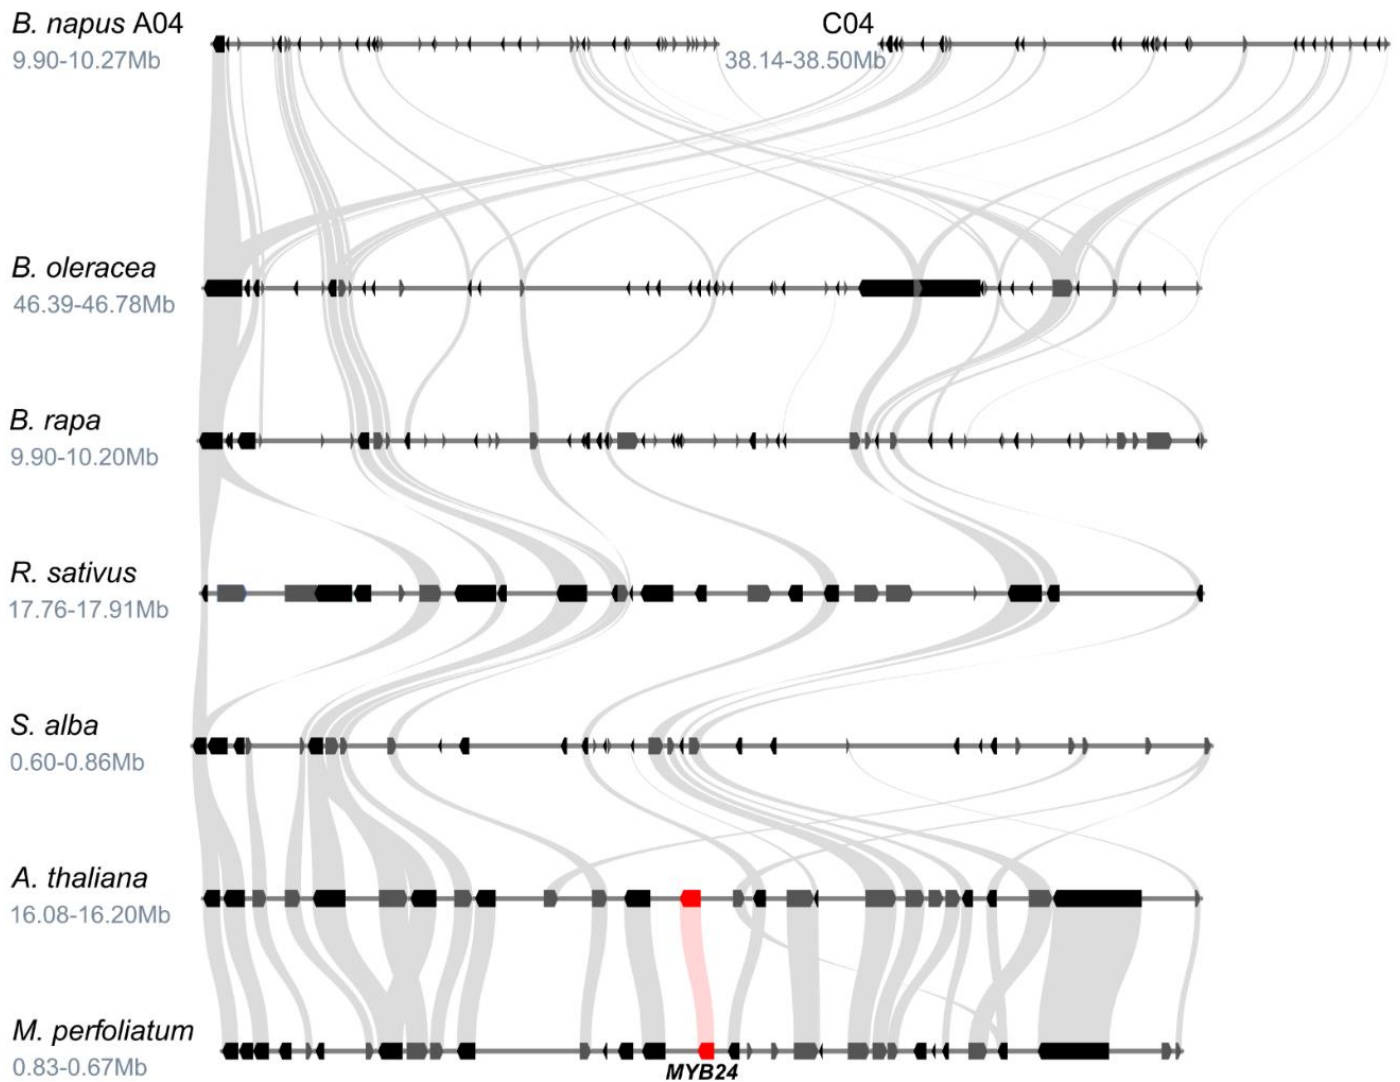

233

234

235

236

237

238

239

240

241

242

243

244

245

246

247

248

249

250

251

252

253

254

255

**Figure 7: Synteny analysis of the MYB24 locus suggests gene loss in the Brassiceae.** The syntenic relationship at the MYB24 locus is shown for several Brassicaceae members. The position of the genomic region in the respective genome assembly is given underneath the species name in million base pairs (Mb). Grey curved beams connect the identified syntenic genes. The rectangle shaped arrows represent annotated genes. Genes located on the forward strand are shown in grey and genes located on the reverse strand are shown in black. MYB24 homologs are marked in red and connected by light red lines. The assembly continuity at the MYB24 locus was too low to analyse local synteny in *C. maritima*, *E. vesicaria*, and *C. hispanica*. A second *S. alba* locus sharing the same degree of local synteny is not shown for clarity (Additional file 6).

#### Gene expression analyses of SG19 MYBs

Analysis of tissue-specific expression patterns of SG19 members in *B. napus* revealed that all *BnaMYB21* homologs are strongly expressed in stamens, pistils, sepals, and petals (Table 2). However, *BnaMYB21-2\_A09p002640* is expressed at higher levels in roots and seed coat 21-28 DAF compared to the other *BnaMYB21* homologs. While the expression of *BnaMYB57* homologs, if expressed, in stamens and sepals was lower compared to *BnaMYB21* homologs, it was frequently higher in petals and pistils. Interestingly only *BnaMYB57-3\_C03p034120* and *BnaMYB57-4\_A03p028260* were expressed in all four floral tissues with *BnaMYB57-3* being exceptionally strongly expressed in petals. The *BnaMYB57-2\_A05p000230* gene is expressed in pistils, sepals and petals but is only marginally expressed in stamens, while *BnaMYB57-1\_C05p047780* is only expressed in petals. Interestingly, *BnaMYB57-4\_A03p028260* revealed uniquely high expression in young seeds, while *BnaMYB57-3\_C03p034120* showed uniquely high expression in seed coat 42 DAF and endosperm. To summarize, the expression patterns of *BnaMYB57-1\_C05p047780* and *BnaMYB57-2\_A05p000230* overlap completely with the other *BnaMYB57* homologs, which show as well similar expression patterns. Co-expression analysis of the majority of SG19 members in *B. napus* revealed a correlation level too low to be considered as strong

256 co-expression. However, *BnaMYB57-3\_C03p034120* and *BnaMYB57-4\_A03p028260* were co-expressed with each other  
 257 (Additional file 5).

258 **Table 2: Tissue-specific expression of SG19 MYBs in *B. napus*.** The tissue-specific expression of the identified *MYB21*  
 259 and *MYB57* homologs in *B. napus* is presented in mean transcripts per million (TPMs). The number of analysed data  
 260 sets per tissue is stated in brackets (n=X). Intensity of the blue colouration indicates the expression strength (darker =  
 261 stronger expression). Abbreviations: weeks after pollination (WAP), days after pollination (DAP), days after flowering  
 262 (DAF), days (D), shoot apical meristem (SAM).

|                          | <i>MYB21-1</i><br><i>C09p003180</i> | <i>MYB21-2</i><br><i>A09p002640</i> | <i>MYB21-3</i><br><i>C07p017730</i> | <i>MYB21-4</i><br><i>A06p033190</i> | <i>MYB57-1</i><br><i>C05p047780</i> | <i>MYB57-2</i><br><i>A05p000230</i> | <i>MYB57-3</i><br><i>C03p034120</i> | <i>MYB57-4</i><br><i>A03p028260</i> |
|--------------------------|-------------------------------------|-------------------------------------|-------------------------------------|-------------------------------------|-------------------------------------|-------------------------------------|-------------------------------------|-------------------------------------|
| SAM (n=16)               | 0.4                                 | 0.9                                 | 0.2                                 | 0.0                                 | 0.0                                 | 0.0                                 | 0.0                                 | 0.0                                 |
| Anther prophase 1 (n=12) | 0.0                                 | 0.0                                 | 0.0                                 | 0.2                                 | 0.0                                 | 0.0                                 | 0.0                                 | 0.0                                 |
| Anther bolting (n=6)     | 0.0                                 | 0.0                                 | 0.0                                 | 0.0                                 | 0.0                                 | 0.0                                 | 0.0                                 | 0.0                                 |
| Anther flowering (n=4)   | 0.0                                 | 0.0                                 | 0.0                                 | 0.4                                 | 0.0                                 | 0.0                                 | 0.6                                 | 0.9                                 |
| Stamen (n=1)             | 115.5                               | 106.0                               | 263.0                               | 199.3                               | 0.0                                 | 0.4                                 | 21.2                                | 43.0                                |
| Ovule (n=1)              | 0.2                                 | 0.0                                 | 0.2                                 | 0.1                                 | 0.0                                 | 0.1                                 | 1.2                                 | 0.9                                 |
| Pistil (n=3)             | 38.6                                | 73.6                                | 86.2                                | 90.5                                | 0.0                                 | 112.3                               | 132.6                               | 139.9                               |
| Sepal (n=1)              | 134.3                               | 134.3                               | 181.7                               | 90.8                                | 0.0                                 | 4.9                                 | 14.0                                | 4.6                                 |
| Petal (n=2)              | 201.9                               | 339.1                               | 358.9                               | 496.3                               | 113.5                               | 592.6                               | 1,521.1                             | 360.5                               |
| bud (n=33)               | 0.7                                 | 2.6                                 | 1.7                                 | 1.9                                 | 0.0                                 | 0.0                                 | 0.5                                 | 0.6                                 |
| Silique 10-20DAF (n=13)  | 0.2                                 | 1.0                                 | 0.0                                 | 0.1                                 | 0.0                                 | 0.1                                 | 0.6                                 | 0.2                                 |
| Silique 25DAF (n=6)      | 0.3                                 | 0.5                                 | 0.2                                 | 0.2                                 | 0.0                                 | 0.1                                 | 0.2                                 | 0.1                                 |
| Silique 30DAF (n=6)      | 0.0                                 | 0.0                                 | 0.1                                 | 0.1                                 | 0.0                                 | 0.1                                 | 0.2                                 | 0.1                                 |
| Silique 40DAF (n=2)      | 0.0                                 | 0.1                                 | 0.1                                 | 0.0                                 | 0.0                                 | 0.0                                 | 0.0                                 | 0.0                                 |
| Seed 2WAP (n=1)          | 0.0                                 | 0.0                                 | 0.0                                 | 0.0                                 | 0.0                                 | 0.0                                 | 1.4                                 | 5.6                                 |
| Seed 4WAP (n=1)          | 0.0                                 | 0.0                                 | 0.0                                 | 0.1                                 | 0.0                                 | 0.1                                 | 0.3                                 | 0.3                                 |
| Seed 6WAP (n=1)          | 0.0                                 | 0.0                                 | 0.0                                 | 0.0                                 | 0.0                                 | 0.0                                 | 0.1                                 | 0.1                                 |
| Seed 8WAP (n=1)          | 0.1                                 | 0.0                                 | 0.0                                 | 0.0                                 | 0.0                                 | 0.0                                 | 0.0                                 | 0.0                                 |
| Seed brown 26DAF (n=1)   | 1.2                                 | 1.1                                 | 0.2                                 | 0.3                                 | 0.0                                 | 0.1                                 | 0.3                                 | 0.1                                 |
| Seed yellow 26DAF (n=1)  | 0.4                                 | 0.3                                 | 0.0                                 | 0.2                                 | 0.0                                 | 0.1                                 | 0.3                                 | 0.1                                 |
| Seed coat 14DAF (n=7)    | 0.0                                 | 0.1                                 | 0.1                                 | 0.0                                 | 0.0                                 | 0.0                                 | 0.6                                 | 1.5                                 |
| Seed coat 21DAF (n=6)    | 0.0                                 | 4.1                                 | 0.3                                 | 1.2                                 | 0.0                                 | 0.0                                 | 0.8                                 | 1.5                                 |
| Seed coat 28DAF (n=6)    | 0.0                                 | 7.3                                 | 0.6                                 | 2.0                                 | 0.0                                 | 0.0                                 | 0.9                                 | 0.4                                 |
| Seed coat 35DAF (n=6)    | 0.0                                 | 0.7                                 | 0.3                                 | 0.3                                 | 0.0                                 | 0.0                                 | 1.4                                 | 0.4                                 |
| Seed coat 42DAF (n=6)    | 0.0                                 | 0.2                                 | 1.0                                 | 0.1                                 | 0.0                                 | 0.0                                 | 5.3                                 | 1.9                                 |
| Embryo (n=6)             | 0.0                                 | 0.0                                 | 0.0                                 | 0.0                                 | 0.0                                 | 0.0                                 | 0.0                                 | 0.0                                 |
| Endosperm (n=8)          | 0.0                                 | 0.0                                 | 1.0                                 | 0.5                                 | 0.0                                 | 0.0                                 | 3.5                                 | 1.1                                 |
| Seedling (n=9)           | 0.0                                 | 0.6                                 | 0.0                                 | 0.0                                 | 0.0                                 | 0.1                                 | 0.5                                 | 0.1                                 |
| Cotyledon 7-10D (n=34)   | 0.0                                 | 0.1                                 | 0.0                                 | 0.0                                 | 0.0                                 | 0.0                                 | 0.9                                 | 0.4                                 |
| Leaf juvenile (n=12)     | 0.0                                 | 0.2                                 | 0.0                                 | 0.0                                 | 0.0                                 | 0.0                                 | 0.3                                 | 0.6                                 |
| Leaf old (n=12)          | 0.0                                 | 0.1                                 | 0.1                                 | 0.0                                 | 0.0                                 | 0.0                                 | 1.1                                 | 1.2                                 |



|                           |     |     |     |     |     |     |     |     |
|---------------------------|-----|-----|-----|-----|-----|-----|-----|-----|
| Internode flowering (n=6) | 0.0 | 0.1 | 0.1 | 0.0 | 0.0 | 0.1 | 0.0 | 0.1 |
| Stem (n=19)               | 0.3 | 0.6 | 0.3 | 0.3 | 0.0 | 0.2 | 0.3 | 0.4 |
| Shoot (n=2)               | 0.0 | 0.0 | 0.0 | 0.0 | 0.0 | 0.0 | 0.0 | 0.2 |
| Shoot apices (n=2)        | 0.0 | 0.1 | 0.1 | 0.0 | 0.1 | 0.0 | 0.0 | 0.0 |
| Root seedling (n=13)      | 0.0 | 0.0 | 0.0 | 0.0 | 0.0 | 0.0 | 0.0 | 0.2 |
| Root 30DAP (n=20)         | 1.0 | 6.2 | 0.5 | 0.2 | 0.0 | 0.1 | 0.1 | 0.1 |
| Root 60DAP (n=2)          | 0.6 | 0.4 | 0.1 | 0.0 | 0.0 | 0.0 | 0.0 | 0.0 |

263

## 264 Discussion

265 In this study we analyzed flavonol regulators across 31 Brassicaceae species spanning 17 tribes. We identified a  
 266 deep duplication giving rise to *MYB12*, *MYB111* and *MYB21* likely preceding the divergence of Brassicaceae, which was  
 267 followed by the loss of *MYB11* and *MYB24* after the divergence of the Brassicaceae (Figure 8).

268 *Polyploidization events have shaped the evolution of the SG7 and SG19 MYBs inside the Brassicaceae*

269 WGD events are known to influence genetic diversification and species radiation. Polyploidization events allow  
 270 an adaptive advantage by providing the genetic basis for gene neo- and subfunctionalisation [20]. Additionally, affected  
 271 genomes are characterized by extensive re-diploidization, typically associated with chromosomal rearrangements, ge-  
 272 nome size reduction and increased fractionation [55]. These events can lead to gene losses while duplicated genomic  
 273 regions can still be identified [56, 55]. Besides the paleo-polyploidization events At- $\gamma$ , At- $\beta$ , and At- $\alpha$ , lineage-specific  
 274 meso-polyploidization events took place during the evolution of several Brassicaceae tribes including Brassicaceae, Isa-  
 275 tideae, and Thelypodieae [21, 22, 57, 23]. The meso-polyploidization event of *Isatis tinctoria* (Isatideae) likely resulted in  
 276 the duplication of all SG7 and SG19 members as inferred by the close phylogenetic relationship of the duplicated hom-  
 277 ologs (Figure 4, Figure 6). These duplication events are thus independent from the observed duplication events inside  
 278 the Brassicaceae and Thelypodieae. The duplicated *MYB12*, *MYB111*, and *MYB21* homologs of the Thelypodieae fall into  
 279 separate clades, thus suggesting that these duplication events might not be associated with the independent meso-pol-  
 280 yploidization event but rather belong to a deeper duplication that took place in the common ancestor of Brassicaceae and  
 281 Thelypodieae. One of the most recent Brassicaceae phylogenies suggests Brassicaceae and Thelypodieae to be closely  
 282 related monophyletic sister clades while Isatideae is sister to both, supporting this hypothesis [4]. However, additional  
 283 research including more data from Brassicaceae sister tribes, e.g. the Sisymbrieae, is needed to further pin-point the time-  
 284 point of the *MYB12*, *MYB111*, and *MYB21* duplication events. The *MYB57* duplication observed in 7/9 Brassicaceae spe-  
 285 cies, but not in the Thelypodieae, is likely associated with the Brassicaceae-specific whole-genome triplication (WGT)  
 286 dated to 7.9–14.6 my [15, 16]. This Br- $\alpha$  WGT event was shown to have been followed by taxon- and lineage-specific  
 287 chromosome rearrangements resulting in chromosome number reductions [15, 16], which might be associated with the  
 288 observed secondary loss of one *MYB57* homolog in the closely related *Sinapis alba* and *Crambe hispanica* (Figure 6).

289 Succeeding these duplication events we identified the loss of *MYB11* after the divergence of *Eruca vesicaria* (Bras-  
 290 siceae) and the loss of *MYB24* after the divergence of the Brassicaceae (Figure 4). The loss of *MYB11* and *MYB24* inside  
 291 the Brassicaceae was further supported by the absence of these homologs in the respective genomic regions showing the  
 292 highest local synteny to the *MYB11* and *MYB24* loci in *A. thaliana* and other Brassicaceae species (Figure 5, Figure 7).  
 293 Recently, Li *et al.* 2020 analysed the distribution of R2R3-MYBs in nine Brassicaceae (*A. thaliana*, *Arabidopsis lyrata*,  
 294 *Capsella rubella*, *Capsella grandiflora*, *Boechera stricta*, *B. napus*, *B. oleracea*, *B. rapa*, *Eutrema salsugineum*) and seven non-  
 295 Brassicaceae species (*Carica papaya*, *Theobroma cacao*, *Gossypium raimondii*, *Citrus clementina*, *Citrus sinensis*, *Manihot escu-*  
 296 *lenta*, *Eucalyptus grandis*) [32]. In accordance with our results no *MYB11* or *MYB24* homolog was identified for the three  
 297 analysed Brassicaceae species and at least two *MYB12*, *MYB21*, *MYB111*, and *MYB57* homologs were detected for *B. rapa*  
 298 and *B. napus*. However, for *B. oleracea* only one *MYB12*, *MYB111*, and *MYB21* homolog was identified, along with two  
 299 *MYB57* homologs. This difference might be explained by the use of a short-read assembly (N50 = ~27 kbp, 5,425 contigs)  
 300 vs. a long-read assembly (N50 = ~9,491 kbp, 264 contigs) used in this study in which more homologs could be resolved.  
 301 In summary, the duplications of *MYB12*, *MYB111*, and *MYB21* identified in all Brassicaceae species are derived from a  
 302 deep duplication event presumably preceding the divergence of Brassicaceae. The subsequent loss of *MYB24* and *MYB11*  
 303 inside the Brassicaceae might have occurred during the course of post-mesopolyploidization of the Br- $\alpha$  WGT event.

304 *The impact of gene redundancy and different tissue-expression pattern on SG7 and SG19 MYB evolution inside Brassicaceae*

305 Gene redundancy accompanied with differential spatial expression has been observed for the SG7 MYBs in *A. thaliana* seedlings: *MYB12* is expressed in roots, while *MYB111* is expressed in cotyledons and *MYB11* is only marginally  
306 expressed in defined narrow domains of the seedling like the root tip and the apex of cotyledons [41]. Thus, *MYB12* and  
307 *MYB111* were designated as the main flavonol regulators in *A. thaliana* seedlings [41]. Moreover, Stracke *et al.* postulated  
308 that *MYB12* and *MYB11* regulate different targets involved in the production of specific flavonol derivatives because  
309 the single mutants displayed differences in the composition of flavonol derivatives. In contrast, the *MYB11* single mu-  
310 tant revealed a flavonol composition that is comparable to the wild type [41]. Moreover, the expression pattern of SG7  
311 members in *B. napus* differs from the ones described for *A. thaliana* seedlings: *BnaMYB12* are predominantly expressed  
312 in reproductive tissues and *BnaMYB111* in anthers and buds. One of the main target genes of the SG7 members, *flavonol*  
313 *synthase (FLS)*, is also mainly expressed in reproductive tissues in *B. napus* [58] indicating the relevance of the transcrip-  
314 tional activation of flavonol accumulation in reproductive tissues. Reduced flavonol levels were linked with decreased  
315 pollen viability and germination, as e.g. pollen germination increased with increasing flavonol concentrations and  
316 kaempferol supplementation rescued pollen fertility [59, 60]. In general, overlapping expression patterns of *BnaMYB12*  
317 and *BnaMYB111* homologs were identified, accompanied by tissue-specific expression of single *BnaMYB12* and  
318 *BnaMYB111* homologs. The majority of *BnaMYB12* and *BnaMYB111* homologs were co-expressed with genes involved  
319 in or associated with flavonoid biosynthesis, indicating their proposed role in the regulation of this pathway. These  
320 findings indicate that the *BnaMYB12* and *BnaMYB111* homologs might be active in the same tissues showing (partial)  
321 functional redundancy, while the unique expression domains of single homologs could explain why single homologs  
322 are retained. Additionally, specific sequence features might play a role in subfamily and gene retention, as *BnaR2R3-*  
323 *MYB* subfamilies with a specific intron pattern are more likely to be retained [30, 32]. The *BnaMYB21* and *BnaMYB57*  
324 homologs revealed strong and overlapping expression in stamens, pistils, sepals and petals. Again tissue-specific ex-  
325 pression of single *BnaMYB21* and *BnaMYB57* homologs was identified. Taken together, it seems likely that the dupli-  
326 cated *MYB12* and *MYB111* homologs and *MYB21* and *MYB57* homologs inside the Brassicaceae can compensate for the  
327 loss of *MYB11* and *MYB24*, respectively. Recent functional analyses of *BnaWER* homologs (S15) indicate that genes  
328 derived from the same subfamily, which share high sequence similarity and similar expression patterns, frequently  
329 show functional redundancy [32]. However, further research is necessary to elucidate the biological meaning and func-  
330 tion of the *MYB12*, *MYB111*, *MYB21*, and *MYB57* duplications and proteins, respectively.

332 One well-known example of the evolution of novel traits in the Brassicales, including Brassicaceae, is the emergence  
333 of glucosinolates (GSLs) along with the corresponding R2R3-MYB transcriptional regulators *MYB28*, *MYB29*, *MYB34*,  
334 *MYB51*, *MYB76* and *MYB122*, which belong to subgroup 12 [25, 61]. This MYB clade is proposed to result from the At- $\beta$   
335 paleo-polyploidization event [62]. *MYB28*, *MYB29*, and *MYB76* act as positive regulators of aliphatic GLSs with over-  
336 lapping functions and *MYB28* and *MYB29* as main regulators being able to compensate the lack of *MYB76* in *A. thaliana*  
337 [63]. While *MYB76* is present in *A. thaliana* (Camelineae), no *MYB76* has been identified in *Brassica* species (Brassicaceae)  
338 [61] posing a striking example of gene loss inside specific Brassicaceae species. Interestingly, we observed that the di-  
339 vergence of *MYB11* and *MYB12*, as well as *MYB21* and *MYB24*, likely occurred after the divergence of the Cleomaceae  
340 from its sister group the Brassicaceae (Figure 3). Previous studies included only *A. thaliana* as a single Brassicaceae  
341 species [30, 31], thus could not analyse Brassicaceae-specific expansion of SG7 and SG19 MYBs. However, Li *et al.* 2020  
342 investigated the SG7 and SG19 homologs of nine Brassicaceae species and seven non-Brassicaceae species, thereby re-  
343 vealing five Brassicaceae-specific subfamilies and five subfamilies which were absent from the investigated Brassicaceae  
344 species [32]. In accordance with our hypothesis, the non-Brassicaceae SG7 and SG19 homologs did not fall into two  
345 separate *MYB11* and *MYB12* clades, as well as *MYB21* and *MYB24* clades, respectively, while the Brassicaceae homologs  
346 did [32]. Thus our study used a broad range of Brassicaceae- and related species like *Cleome violacea*, allowing the  
347 in-depth analysis and identification of Brassicaceae-specific expansion of SG7 and SG19 MYBs. This finding serves as  
348 an example of the adaptive evolution of the flavonol-regulating R2R3-MYB transcription factors frequently accompa-  
349 nied by sub- and neofunctionalization in Brassicaceae species where a *MYB11* and *MYB24* homolog was retained. More-  
350 over, our results suggest that lineage-specific expansion or reduction of MYB subfamilies might have occurred fre-  
351 quently in the Brassicaceae, in line with the high degree of flexibility and complex evolution observed for the *B. napus*  
352 R2R3-MYB subfamilies.

353 *Limitations of the study*

354 The quality of the sequence data sets used in this study varies between species. Different degrees of completeness  
 355 can influence the identification of homologs. For example, no *MYB11*, *MYB12*, *MYB24*, and *MYB57* homolog was iden-  
 356 tified in *Stanleya pinnata*, probably due to the low completeness (71 % complete BUSCOs) observed for this data set  
 357 (Additional file 4). Additionally, *Brassica cretica* revealed a comparably low completeness of 74.5 % and no *MYB12* hom-  
 358 olog was identified (Additional file 4). The recent release of genomic resources for several Brassicaceae mem-  
 359 bers allowed us to investigate the evolution of the SG7 and SG19 MYBs in great detail. Thus, in this study we were able to  
 360 cover 17 of the 51 Brassicaceae tribes with at least one representative species. However, additional genome sequences  
 361 of Brassicaceae species will help to support our hypotheses and to further narrow down the time-point of the SG7 and  
 362 SG19 duplication and gene loss events. The species tree revealed minor differences to the phylogeny of taxonomic stud-  
 363 ies like Huang et al. 2015 [9], Nikolov et al., 2019 [10] and Walden et al. 2020 [4]. However, the phylogenetic positions of  
 364 the tribes is still not fully resolved due to different results derived from nuclear and plastid data which, among other  
 365 reasons, explains the inconsistencies of Brassicaceae taxonomy studies (summarised in Walden et al., 2020).

## 366 Conclusions

367 In this study we unraveled the evolution of the flavonol regulators SG7 and SG19 R2R3-MYBs in the Brassicaceae  
 368 with focus on the tribe Brassicaceae (Figure 8). A deep duplication of the SG7 MYBs *MYB12* and *MYB111*, likely preceding  
 369 the divergence of Brassicaceae, was followed by the loss of *MYB11* after the divergence of *E. vesicaria*. Similarly, a dupli-  
 370 cation of *MYB21* likely preceding the divergence of the Brassicaceae was associated with the loss of *MYB24* inside the  
 371 Brassicaceae. Due to the overlapping spatio-temporal expression patterns of the SG7 and SG19 members in the Brassicaceae  
 372 member *B. napus*, the loss of *MYB11* and *MYB24* is likely to be compensated for by the remaining homologs. Therefore,  
 373 we propose that polyploidization events and gene redundancy have influenced the evolution of the flavonol regulators  
 374 in the Brassicaceae, especially in the tribe Brassicaceae.

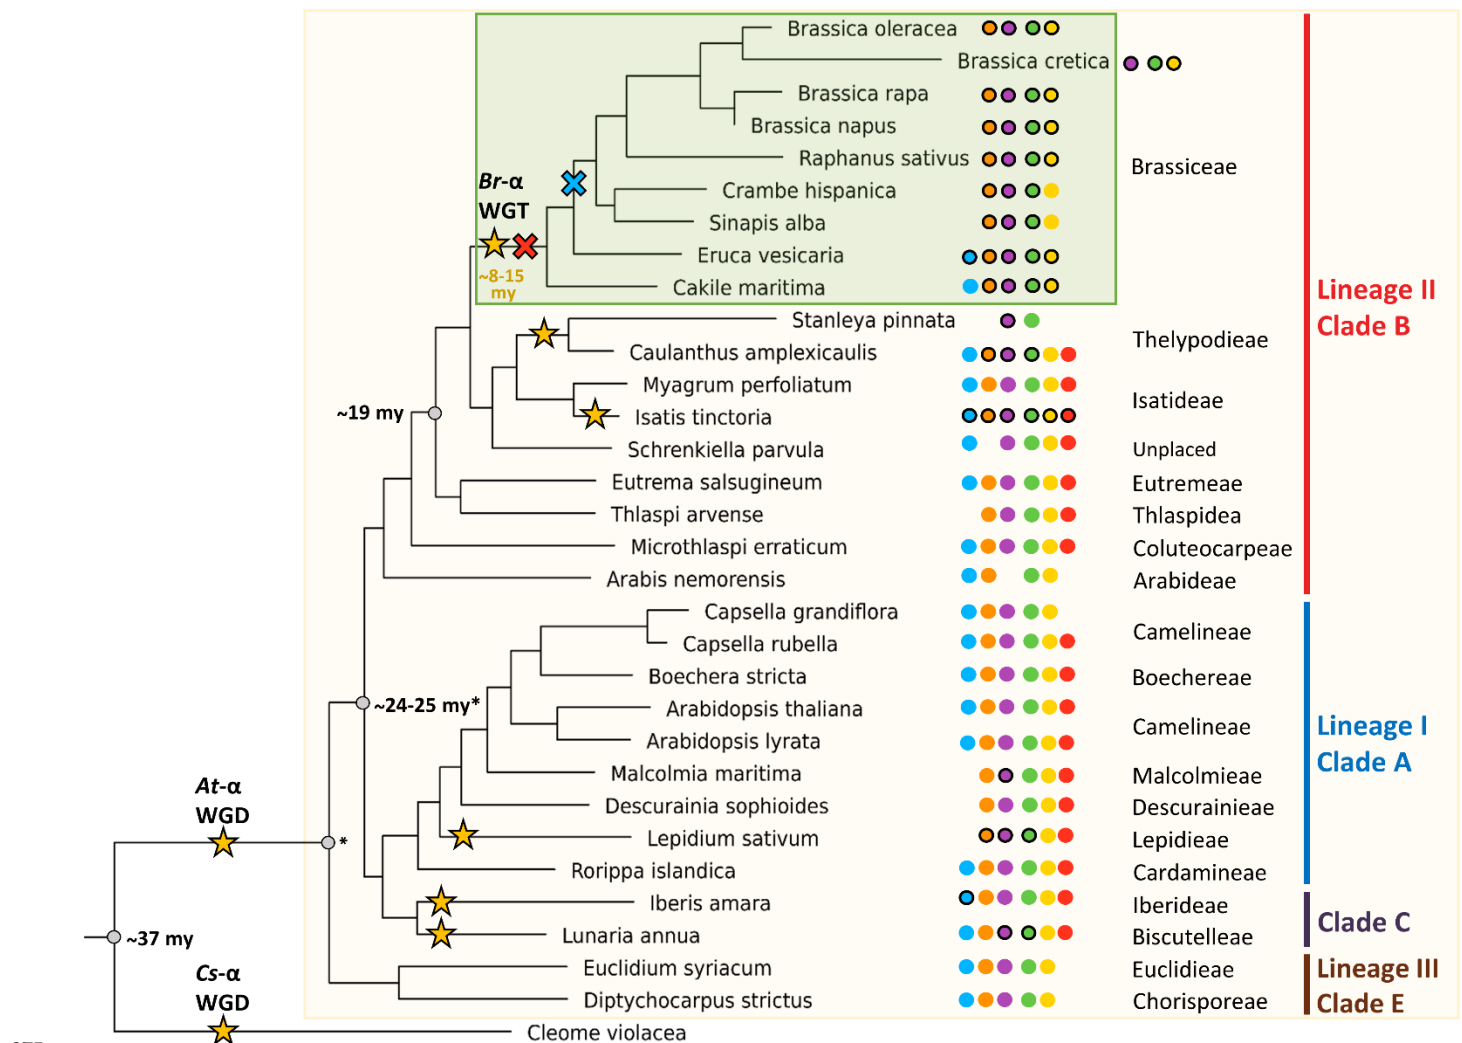

376 **Figure 8: Graphical abstract of SG7 and SG19 evolution in Brassicaceae.** The proposed duplication and gene loss  
377 events inside the Brassicaceae are shown. SG7 and SG19 homologs identified in Brassicaceae species are marked with  
378 different coloured circles: *MYB11* in light blue, *MYB12* in orange, *MYB111* in violet, *MYB21* in green, *MYB57* in yellow,  
379 and *MYB24* in red. If at least two homologs were detected in the species the circle was marked with a dark outline. The  
380 assumed loss of *MYB11* is marked with a light blue cross, while the proposed loss of *MYB24* is marked with a red cross.  
381 The duplication events of *MYB12*, *MYB111* and *MYB21* likely preceded the divergence of the Brassicaceae tribe.

## 382 **Methods**

### 383 *Data collection, quality control and species tree generation*

384 Genomic data sets of 44 species, including 31 species of the Brassicaceae, were retrieved mainly from Phytozome,  
385 NCBI and Genoscope (Additional file 1). To assess the completeness and duplication level of all annotated polypeptide  
386 sequences BUSCO v3.0.2 was deployed using the embryophyta\_odb9 lineage dataset in protein mode [64]. OrthoFinder  
387 v2.5.4 [65–67] was used to construct a species tree using the 44 proteome data sets as input.

### 388 *Genome-wide identification of MYB homologs*

389 Genome-wide identification of MYB and MYB-like transcription factors was performed using MYB annotator  
390 v0.153 [68]. MYB annotator was run with the default bait sequences and the proteome data sets of all 44 species were  
391 subjected to this analysis. The extracted MYB polypeptide sequences per species were combined and used for the phy-  
392 logenetic analysis.

### 393 *Phylogenetic tree construction*

394 For the generation of a phylogenetic tree, first the full-length polypeptide sequences of the genome-wide identified  
395 MYB homologs per species were combined into one file (Additional file 7) and then used for the construction of a  
396 MAFFT v7.475 [69] alignment. This analysis covered 44 species (Additional file 1). Next, a codon alignment was pro-  
397 duced via pxa2cdn [70] i.e. converting the amino acids of the alignment back to their respective codons. As no CDS file  
398 was available for *Arabis nemorensis*, *Brassica cretica* and *Microthalspi erraticum*, these species were not incorporated in this  
399 analysis. However, the SG7 and SG19 homologs identified in these species based on polypeptide sequences are listed  
400 in Additional file 8. Subsequently, the alignment was cleaned by removal of all columns with less than 10 percent occu-  
401 pancy as described before [71]. The cleaned alignment was then used for the construction of an approximately-maxi-  
402 mum-likelihood phylogenetic tree constructed with FastTree 2 [72] using the WAG model and 10,000 bootstrap repli-  
403 cations in addition to the following parameters to increase accuracy: -spr 4 -mlacc 2 -slownni -gamma. This phylogenetic  
404 tree covering all genome-wide MYBs from 41 species was then used for the identification of the SG7 and SG19 clade  
405 followed by the extraction of the included MYB polypeptide sequences by a customized python script (extract\_red.py)  
406 [73]. Additionally, the SG5 and MYB99 homologs were extracted because MYB123 (SG5) regulates a competing branch  
407 of the flavonoid pathway and is sister clade to SG7 and MYB99 is involved in the regulation of SG19 MYBs. Again, an  
408 alignment of polypeptide sequences (corresponding CDS sequences are listed in Additional file 9) was constructed  
409 followed by its conversion into a codon alignment and cleaning as described above. Next, the cleaned codon alignment  
410 was used to construct a tree via RAXML-NG v.1.0.1 [74] using the GTR+GAMMA model. The best-scoring topology was  
411 inferred from 50 tree searches using 25 random and 25 parsimony-based starting trees. To infer a bootstrap tree, again  
412 the GTR+GAMMA model was used including 9800 bootstrap replicates until bootstrap convergence was reached after  
413 8750 bootstraps (weighted Robinson-Foulds (RF) distance = 0.646, 1% cutoff). The bootstrap support values were then  
414 mapped onto the best-scoring Maximum Likelihood (ML) tree. After monophyletic tip masking, the resulting tree with  
415 bootstrap support values was visualized using FigTree v1.4.3 (Additional file 3). MYBs per species were classified ac-  
416 cording to their relationships with *A. thaliana* homologs.

### 417 *Synteny and BLAST analysis*

418 JCVI [75] was used to analyse local synteny and visualize syntenic regions. To analyse a potential gene loss event  
419 in a species in detail a TBLASTN [76] against the high local synteny regions using *AthMYB11* and *AthMYB24* as queries  
420 was performed with all Brassicaceae members, *I. tinctoria* and *M. perfoliatum*. Moreover, TBLASTN was run against the  
421 respective assemblies of these species to search for potential gene fragments of *MYB11* and *MYB24* outside of the  
422 syntenic regions. For this analysis a customized python script was used (TBLASTN\_check.py) [73], which identifies  
423 whether a TBLASTN hit is located inside an annotated gene or not. If several blast hits correspond to the same gene  
424 (e.g. multiple exons), the identifier of this gene will only be extracted once. If the TBLASTN hit is not located inside a



425 gene, the start and end position on the subject sequence will be extracted and used for a web-based BLASTN search to  
426 identify potential homologs. The top five hits were then used to extract the amino acid sequence from the corresponding  
427 gene ID and then subjected to phylogenetic analysis including all 126 *AthR2R3*-MYBs via FastTree 2 [72]. This analysis  
428 revealed their closest *AthMYB* homolog for classification. If the closest homolog was not MYB11 or MYB24, this would  
429 further support the absence of these homologs in the analysed species.

#### 430 *Gene expression analysis*

431 Public RNA-Seq data sets were used and retrieved from the Sequence Read Archive via fastq-dump v.2.9.64 [77]  
432 to analyze the expression of MYB genes across various tissues (Additional file 10). Transcript abundance, i.e. read counts  
433 and transcripts per millions (TPMs), was calculated via kallisto v. 0.44 [78] using default parameters and the transcript  
434 file of the *B. napus* cultivar Express 617 [79]. The heatmap was constructed with a customized python script calculating  
435 mean TPMs per tissue using 276 paired-end RNA-Seq data sets from *B. napus* as previously described [58]. Condition-  
436 independent co-expression analysis was performed as described before [58] to identify co-expressed genes using Spear-  
437 man's correlation coefficient by incorporating 696 *B. napus* RNA-Seq data sets.

#### 438 **Supplementary Information**

439 **Additional file 1: Information about the used data sets.** The version and reference of the data set per species are listed. Moreover,  
440 the completeness and duplication level of the respective proteome data set per species is stated based on BUSCOs. Brassicaceae  
441 species are highlighted in green.

442 **Additional file 2: 1R-, R2R3-, and 3R-MYBs composition per analysed species.** The number of 1R-, R2R3-, and 3R-MYBs per ana-  
443 lysed species is listed as identified and classified by MYB annotator. Brassicaceae species are highlighted in green. Brassicaceae species  
444 are shown in italics.

445 **Additional file 3: Phylogenetic tree of SG5, SG7, SG19 and MYB99 members.** Bootstrap values are represented as percentages.

446 **Additional file 4: Number and gene identifiers of the identified SG7 and SG19 homologs per Brassicaceae species.** Brassicaceae  
447 species are highlighted in green. If more than one SG7 and SG19 homolog was identified the number was marked in bold. The BUSCO  
448 completeness of the data set per species is stated.

449 **Additional file 5: Co-expression analysis of SG7 and SG19 MYB family members in *B. napus*.** Yellow highlighted homologs are  
450 described in the main text and the threshold for strong co-expression (Spearman's correlation coefficient  $\geq 0.7$ ) is marked with a  
451 black line.

452 **Additional file 6: Synteny analysis of the MYB24 locus including the second *S. alba* high local synteny locus.**

453 **Additional file 7: Polypeptide sequences from the genome-wide MYBs identified by MYB annotator.**

454 **Additional file 8: Polypeptide sequences of SG7 and SG19 homologs identified in *Arabis nemorensis*, *Brassica cretica*, and *Mi-*  
455 *crothalspi erraticum* via MYB annotator.**

456 **Additional file 9: CDS sequences from the phylogenetic tree of SG5, SG7, SG19 and MYB99 members.**

457 **Additional file 10: SRA data sets used for tissue-specific RNA-Seq analysis.** The number of analysed data sets per tissue is stated  
458 in brackets (n=X). The heatmap from white via light to dark blue indicates the expression strength with dark blue symbolizing high  
459 expression. Abbreviations: weeks after pollination (WAP), days after pollination (DAP), days after flowering (DAF), days (D), shoot  
460 apical meristem (SAM).

#### 461 **Declarations**

462 **Acknowledgments** We are grateful to all researchers who submitted the underlying sequences to the appropriate databases, and  
463 published their experimental findings. Some of the sequence data sets used were produced by the US Department of Energy Joint  
464 Genome Institute. We thank the Center for Biotechnology (CeBiTec) at Bielefeld University for providing an environment to perform  
465 the computational analyses.

466 **Funding** We acknowledge support for the publication costs by the Open Access Publication Fund of Bielefeld University and the  
467 Deutsche Forschungsgemeinschaft (DFG), as well as the support of the German Academic Exchange Service.

468 **Availability of data and materials** All datasets underlying this study are publicly available or included within the additional files.

469 **Authors' contributions** HMS and BJB designed the research. HMS performed bioinformatic analyses. HMS and BJB interpreted the  
470 results and wrote the manuscript. Both authors read and approved the final version of the manuscript.

471 **Ethics approval and consent to participate** Not applicable.

472 **Consent for publication** Not applicable.

473 **Competing interests** The authors declare that they have no competing interests.

## 474 **References**

475 1. Koch MA, German DA, Kiefer M, Franzke A. Database Taxonomics as Key to Modern Plant Biology. *Trends Plant*  
476 *Sci.* 2018;23:4–6.

477 2. Warwick SI, Mummenhoff K, Sauder CA, Koch MA, Al-Shehbaz IA. Closing the gaps: phylogenetic relationships in  
478 the Brassicaceae based on DNA sequence data of nuclear ribosomal ITS region. *Plant Systematics and Evolution.*  
479 2010;285:209–32.

480 3. Al-Shehbaz IA. A generic and tribal synopsis of the Brassicaceae (Cruciferae). *Taxon.* 2012;61:931–54.

481 4. Walden N, German DA, Wolf EM, Kiefer M, Rigault P, Huang X-C, et al. Nested whole-genome duplications coincide  
482 with diversification and high morphological disparity in Brassicaceae. *Nat Commun.* 2020;11:3795.

483 5. Hohmann N, Wolf EM, Lysak MA, Koch MA. A Time-Calibrated Road Map of Brassicaceae Species Radiation and  
484 Evolutionary History. *Plant Cell.* 2015;27:2770–84.

485 6. Beilstein MA, Al-Shehbaz IA, Kellogg EA. Brassicaceae phylogeny and trichome evolution. *Am J Bot.* 2006;93:607–19.

486 7. Beilstein MA, Al-Shehbaz IA, Mathews S, Kellogg EA. Brassicaceae phylogeny inferred from phytochrome A and  
487 ndhF sequence data: tribes and trichomes revisited. *Am J Bot.* 2008;95:1307–27.

488 8. Franzke A, Lysak MA, Al-Shehbaz IA, Koch MA, Mummenhoff K. Cabbage family affairs: the evolutionary history  
489 of Brassicaceae. *Trends in Plant Science.* 2011;16:108–16.

490 9. Huang C-H, Sun R, Hu Y, Zeng L, Zhang N, Cai L, et al. Resolution of Brassicaceae Phylogeny Using Nuclear Genes  
491 Uncovers Nested Radiations and Supports Convergent Morphological Evolution. *Mol Biol Evol.* 2015;33:394–412.

492 10. Nikolov LA, Shushkov P, Nevado B, Gan X, Al-Shehbaz IA, Filatov D, et al. Resolving the backbone of the  
493 Brassicaceae phylogeny for investigating trait diversity. *New Phytologist.* 2019;222:1638–51.

494 11. Bowers JE, Chapman BA, Rong J, Paterson AH. Unravelling angiosperm genome evolution by phylogenetic analysis  
495 of chromosomal duplication events. *Nature.* 2003;422:433–8.

496 12. De Bodt S, Maere S, Van de Peer Y. Genome duplication and the origin of angiosperms. *Trends Ecol Evol.*  
497 2005;20:591–7.

498 13. Barker MS, Vogel H, Schranz ME. Paleopolyploidy in the Brassicales: Analyses of the Cleome Transcriptome  
499 Elucidate the History of Genome Duplications in Arabidopsis and Other Brassicales. *Genome Biol Evol.* 2009;1:391–9.

- 500 14. Parkin IAP, Gulden SM, Sharpe AG, Lukens L, Trick M, Osborn TC, et al. Segmental Structure of the Brassica napus  
501 Genome Based on Comparative Analysis With Arabidopsis thaliana. *Genetics*. 2005;171:765–81.
- 502 15. Lysak MA, Koch MA, Pecinka A, Schubert I. Chromosome triplication found across the tribe Brassiceae. *Genome*  
503 *Res*. 2005;15:516–25.
- 504 16. Lysak MA, Cheung K, Kitschke M, Bureš P. Ancestral Chromosomal Blocks Are Triplicated in Brassiceae Species  
505 with Varying Chromosome Number and Genome Size. *Plant Physiol*. 2007;145:402–10.
- 506 17. Lysak MA, Koch MA, Beaulieu JM, Meister A, Leitch IJ. The Dynamic Ups and Downs of Genome Size Evolution in  
507 Brassicaceae. *Molecular Biology and Evolution*. 2009;26:85–98.
- 508 18. Edger PP, Pires JC. Gene and genome duplications: the impact of dosage-sensitivity on the fate of nuclear genes.  
509 *Chromosome Res*. 2009;17:699–717.
- 510 19. Birchler JA, Veitia RA. The gene balance hypothesis: implications for gene regulation, quantitative traits and  
511 evolution. *New Phytologist*. 2010;186:54–62.
- 512 20. Hoffmeier A, Gramzow L, Bhide AS, Kottenhagen N, Greifenstein A, Schubert O, et al. A Dead Gene Walking:  
513 Convergent Degeneration of a Clade of MADS-Box Genes in Crucifers. *Molecular Biology and Evolution*. 2018;35:2618–  
514 38.
- 515 21. Kagale S, Robinson SJ, Nixon J, Xiao R, Huebert T, Condie J, et al. Polyploid Evolution of the Brassicaceae during  
516 the Cenozoic Era. *Plant Cell*. 2014;26:2777–91.
- 517 22. Mandáková T, Li Z, Barker MS, Lysak MA. Diverse genome organization following 13 independent mesopolyploid  
518 events in Brassicaceae contrasts with convergent patterns of gene retention. *Plant J*. 2017;91:3–21.
- 519 23. Kiefer C, Willing E-M, Jiao W-B, Sun H, Piednoël M, Hümann U, et al. Interspecies association mapping links  
520 reduced CG to TG substitution rates to the loss of gene-body methylation. *Nat Plants*. 2019;5:846–55.
- 521 24. Dubos C, Stracke R, Grotewold E, Weisshaar B, Martin C, Lepiniec L. MYB transcription factors in Arabidopsis.  
522 *Trends in Plant Science*. 2010;15:573–81.
- 523 25. Stracke R, Werber M, Weisshaar B. The R2R3-MYB gene family in Arabidopsis thaliana. *Current Opinion in Plant*  
524 *Biology*. 2001;4:447–56.
- 525 26. Ogata K, Kanei-Ishii C, Sasaki M, Hatanaka H, Nagadoi A, Enari M, et al. The cavity in the hydrophobic core of Myb  
526 DNA-binding domain is reserved for DNA recognition and trans-activation. *Nat Struct Mol Biol*. 1996;3:178–87.
- 527 27. Jia L, Clegg MT, Jiang T. Evolutionary Dynamics of the DNA-Binding Domains in Putative R2R3-MYB Genes  
528 Identified from Rice Subspecies indica and japonica Genomes. *Plant Physiology*. 2004;134:575–85.
- 529 28. Rosinski JA, Atchley WR. Molecular Evolution of the Myb Family of Transcription Factors: Evidence for Polyphyletic  
530 Origin. *J Mol Evol*. 1998;46:74–83.

- 
- 531 29. Jiang C, Gu J, Chopra S, Gu X, Peterson T. Ordered origin of the typical two- and three-repeat Myb genes. *Gene*.  
532 2004;326:13–22.
- 533 30. Du H, Liang Z, Zhao S, Nan M-G, Tran L-SP, Lu K, et al. The Evolutionary History of R2R3-MYB Proteins Across 50  
534 Eukaryotes: New Insights Into Subfamily Classification and Expansion. *Sci Rep*. 2015;5:1–16.
- 535 31. Jiang C-K, Rao G-Y. Insights into the Diversification and Evolution of R2R3-MYB Transcription Factors in Plants1.  
536 *Plant Physiology*. 2020;183:637–55.
- 537 32. Li P, Wen J, Chen P, Guo P, Ke Y, Wang M, et al. MYB Superfamily in *Brassica napus*: Evidence for Hormone-  
538 Mediated Expression Profiles, Large Expansion, and Functions in Root Hair Development. *Biomolecules*. 2020;10:E875.
- 539 33. Winkel-Shirley B. Flavonoid Biosynthesis. A Colorful Model for Genetics, Biochemistry, Cell Biology, and  
540 Biotechnology. *Plant Physiology*. 2001;126:485–93.
- 541 34. Borevitz JO, Xia Y, Blount J, Dixon RA, Lamb C. Activation Tagging Identifies a Conserved MYB Regulator of  
542 Phenylpropanoid Biosynthesis. *The Plant Cell*. 2000;12:2383–93.
- 543 35. Gonzalez A, Zhao M, Leavitt JM, Lloyd AM. Regulation of the anthocyanin biosynthetic pathway by the  
544 TTG1/bHLH/Myb transcriptional complex in *Arabidopsis* seedlings. *The Plant Journal*. 2008;53:814–27.
- 545 36. Nesi N, Jond C, Debeaujon I, Caboche M, Lepiniec L. The *Arabidopsis* TT2 gene encodes an R2R3 MYB domain  
546 protein that acts as a key determinant for proanthocyanidin accumulation in developing seed. *Plant Cell*. 2001;13:2099–  
547 114.
- 548 37. Harborne JB, Williams CA. Advances in flavonoid research since 1992. *Phytochemistry*. 2000;55:481–504.
- 549 38. Zhang Q, Zhao X, Hongbin Q. *Flavones and Flavonols: Phytochemistry and Biochemistry*. Springer Berlin  
550 Heidelberg; 2013. p. 1821–47.
- 551 39. Hald C, Dawid C, Tressel R, Hofmann T. Kaempferol 3- O-(2''- O-Sinapoyl- $\beta$ -sophoroside) Causes the Undesired  
552 Bitter Taste of Canola/Rapeseed Protein Isolates. *J Agric Food Chem*. 2019;67:372–8.
- 553 40. Mehrtens F, Kranz H, Bednarek P, Weisshaar B. The *Arabidopsis* Transcription Factor MYB12 Is a Flavonol-Specific  
554 Regulator of Phenylpropanoid Biosynthesis. *Plant Physiology*. 2005;138:1083–96.
- 555 41. Stracke R, Ishihara H, Huep G, Barsch A, Mehrtens F, Niehaus K, et al. Differential regulation of closely related  
556 R2R3-MYB transcription factors controls flavonol accumulation in different parts of the *Arabidopsis thaliana* seedling.  
557 *Plant J*. 2007;50:660–77.
- 558 42. Stracke R, Jahns O, Keck M, Tohge T, Niehaus K, Fernie AR, et al. Analysis of PRODUCTION OF FLAVONOL  
559 GLYCOSIDES-dependent flavonol glycoside accumulation in *Arabidopsis thaliana* plants reveals MYB11-, MYB12- and  
560 MYB111-independent flavonol glycoside accumulation. *New Phytologist*. 2010;188:985–1000.
- 561 43. Battat M, Eitan A, Rogachev I, Hanhineva K, Fernie A, Tohge T, et al. A MYB Triad Controls Primary and  
562 Phenylpropanoid Metabolites for Pollen Coat Patterning. *Plant Physiol*. 2019;180:87–108.



- 563 44. Shan X, Li Y, Yang S, Yang Z, Qiu M, Gao R, et al. The spatio-temporal biosynthesis of floral flavonols is controlled  
564 by differential phylogenetic MYB regulators in *Freesia hybrida*. *New Phytologist*. 2020;228:1864–79.
- 565 45. Zhang X, He Y, Li L, Liu H, Hong G. Involvement of the R2R3-MYB transcription factor MYB21 and its homologs in  
566 regulating flavonol accumulation in *Arabidopsis* stamen. *Journal of Experimental Botany*. 2021;72:4319–32.
- 567 46. Cheng H, Song S, Xiao L, Soo HM, Cheng Z, Xie D, et al. Gibberellin Acts through Jasmonate to Control the  
568 Expression of MYB21, MYB24, and MYB57 to Promote Stamen Filament Growth in *Arabidopsis*. *PLOS Genetics*.  
569 2009;5:e1000440.
- 570 47. Mandaokar A, Browse J. MYB108 Acts Together with MYB24 to Regulate Jasmonate-Mediated Stamen Maturation  
571 in *Arabidopsis*. *Plant Physiol*. 2009;149:851–62.
- 572 48. Qi T, Huang H, Song S, Xie D. Regulation of Jasmonate-Mediated Stamen Development and Seed Production by a  
573 bHLH-MYB Complex in *Arabidopsis*. *The Plant Cell*. 2015;27:1620–33.
- 574 49. Stracke R, Turgut-Kara N, Weisshaar B. The AtMYB12 activation domain maps to a short C-terminal region of the  
575 transcription factor. *Z Naturforsch C J Biosci*. 2017;72:251–7.
- 576 50. Wisman E, Hartmann U, Sagasser M, Baumann E, Palme K, Hahlbrock K, et al. Knock-out mutants from an En-1  
577 mutagenized *Arabidopsis thaliana* population generate phenylpropanoid biosynthesis phenotypes. *Proc Natl Acad Sci*  
578 *USA*. 1998;95:12432–7.
- 579 51. Stracke R, Favory J-J, Gruber H, Bartelniewoehner L, Bartels S, Binkert M, et al. The *Arabidopsis* bZIP transcription  
580 factor HY5 regulates expression of the PFG1/MYB12 gene in response to light and ultraviolet-B radiation. *Plant, Cell &*  
581 *Environment*. 2010;33:88–103.
- 582 52. Chen Z, Zhanwu D, Thilia F, Luis O, Antonio S, Arnau P, et al. The grape MYB24 mediates the coordination of light-  
583 induced terpene and flavonol accumulation in response to berry anthocyanin sunscreen depletion.  
584 2021;2021.12.16.472692.
- 585 53. Thompson JD, Higgins DG, Gibson TJ. CLUSTAL W: improving the sensitivity of progressive multiple sequence  
586 alignment through sequence weighting, position-specific gap penalties and weight matrix choice. *Nucleic Acids Res*.  
587 1994;22:4673–80.
- 588 54. Tamura K, Stecher G, Kumar S. MEGA11: Molecular Evolutionary Genetics Analysis Version 11. *Molecular Biology*  
589 *and Evolution*. 2021;38:3022–7.
- 590 55. Mandáková T, Lysak MA. Post-polyploid diploidization and diversification through dysploid changes. *Curr Opin*  
591 *Plant Biol*. 2018;42:55–65.
- 592 56. Mandáková T, Joly S, Krzywinski M, Mummenhoff K, Lysak MA. Fast Diploidization in Close Mesopolyploid  
593 Relatives of *Arabidopsis*. *Plant Cell*. 2010;22:2277–90.
- 594 57. Mandáková T, Hloušková P, German DA, Lysak MA. Monophyletic Origin and Evolution of the Largest Crucifer  
595 Genomes1. *Plant Physiol*. 2017;174:2062–71.

- 596 58. Schilbert HM, Schöne M, Baier T, Busche M, Viehöver P, Weisshaar B, et al. Characterization of the Brassica napus  
597 Flavonol Synthase Gene Family Reveals Bifunctional Flavonol Synthases. *Frontiers in Plant Science*. 2021;12:2290.
- 598 59. Mo Y, Nagel C, Taylor LP. Biochemical complementation of chalcone synthase mutants defines a role for flavonols  
599 in functional pollen. *Proc Natl Acad Sci U S A*. 1992;89:7213–7.
- 600 60. Muhlemann JK, Younts TLB, Muday GK. Flavonols control pollen tube growth and integrity by regulating ROS  
601 homeostasis during high-temperature stress. *Proceedings of the National Academy of Sciences*. 2018;115:E11188–97.
- 602 61. Seo M-S, Kim JS. Understanding of MYB Transcription Factors Involved in Glucosinolate Biosynthesis in  
603 Brassicaceae. *Molecules*. 2017;22:1549.
- 604 62. Yanhui C, Xiaoyuan Y, Kun H, Meihua L, Jigang L, Zhaofeng G, et al. The MYB transcription factor superfamily of  
605 Arabidopsis: expression analysis and phylogenetic comparison with the rice MYB family. *Plant Mol Biol*. 2006;60:107–  
606 24.
- 607 63. Gigolashvili T, Engqvist M, Yatusевич R, Müller C, Flüge U-I. HAG2/MYB76 and HAG3/MYB29 exert a specific  
608 and coordinated control on the regulation of aliphatic glucosinolate biosynthesis in *Arabidopsis thaliana*. *New*  
609 *Phytologist*. 2008;177:627–42.
- 610 64. Simão FA, Waterhouse RM, Ioannidis P, Kriventseva EV, Zdobnov EM. BUSCO: assessing genome assembly and  
611 annotation completeness with single-copy orthologs. *Bioinformatics*. 2015;31:3210–2.
- 612 65. Emms DM, Kelly S. STRIDE: Species Tree Root Inference from Gene Duplication Events. *Molecular Biology and*  
613 *Evolution*. 2017;34:3267–78.
- 614 66. Emms DM, Kelly S. STAG: Species Tree Inference from All Genes. 2018;:267914.
- 615 67. Emms DM, Kelly S. OrthoFinder: phylogenetic orthology inference for comparative genomics. *Genome Biology*.  
616 2019;20:238.
- 617 68. Pucker B. Automatic identification and annotation of MYB gene family members in plants. *BMC Genomics*.  
618 2022;23:220.
- 619 69. Katoh K, Standley DM. MAFFT Multiple Sequence Alignment Software Version 7: Improvements in Performance  
620 and Usability. *Molecular Biology and Evolution*. 2013;30:772–80.
- 621 70. Brown JW, Walker JF, Smith SA. Phyx: phylogenetic tools for unix. *Bioinformatics*. 2017;33:1886–8.
- 622 71. Pucker B, Reiher F, Schilbert HM. Automatic Identification of Players in the Flavonoid Biosynthesis with Application  
623 on the Biomedicinal Plant *Croton tiglium*. *Plants*. 2020;9:1103.
- 624 72. Price MN, Dehal PS, Arkin AP. FastTree 2 – Approximately Maximum-Likelihood Trees for Large Alignments. *PLOS*  
625 *ONE*. 2010;5:e9490.
- 626 73. Pucker B, Iorizzo M. Apiaceae FNS I originated from F3H through tandem gene duplication. 2022;:2022.02.16.480750.

- 627 74. Kozlov AM, Darriba D, Flouri T, Morel B, Stamatakis A. RAxML-NG: a fast, scalable and user-friendly tool for  
628 maximum likelihood phylogenetic inference. *Bioinformatics*. 2019;35:4453–5.
- 629 75. Tang H, Bowers JE, Wang X, Ming R, Alam M, Paterson AH. Synteny and Collinearity in Plant Genomes. *Science*.  
630 2008. <https://doi.org/10.1126/science.1153917>.
- 631 76. Altschul SF, Gish W, Miller W, Myers EW, Lipman DJ. Basic local alignment search tool. *Journal of Molecular Biology*.  
632 1990;215:403–10.
- 633 77. Leinonen R, Sugawara H, Shumway M. The Sequence Read Archive. *Nucleic Acids Res*. 2011;39 Database issue:D19–  
634 21.
- 635 78. Bray NL, Pimentel H, Melsted P, Pachter L. Near-optimal probabilistic RNA-seq quantification. *Nature*  
636 *Biotechnology*. 2016;34:525–7.
- 637 79. Lee H, Chawla HS, Obermeier C, Dreyer F, Abbadi A, Snowdon R. Chromosome-Scale Assembly of Winter Oilseed  
638 Rape *Brassica napus*. *Front Plant Sci*. 2020;11.
- 639
- 640
